# Supplementary material for: High-precision Sm isotope analysis by thermal ionisation mass spectrometry for large meteorite samples (>1 g)
Source: Royal Society of Chemistry journal article supplement (doi:10.1039/d4ja00301b), 2024-11-18
Supplement: d4ja00301b1.pdf [file d4ja00301b1.pdf]

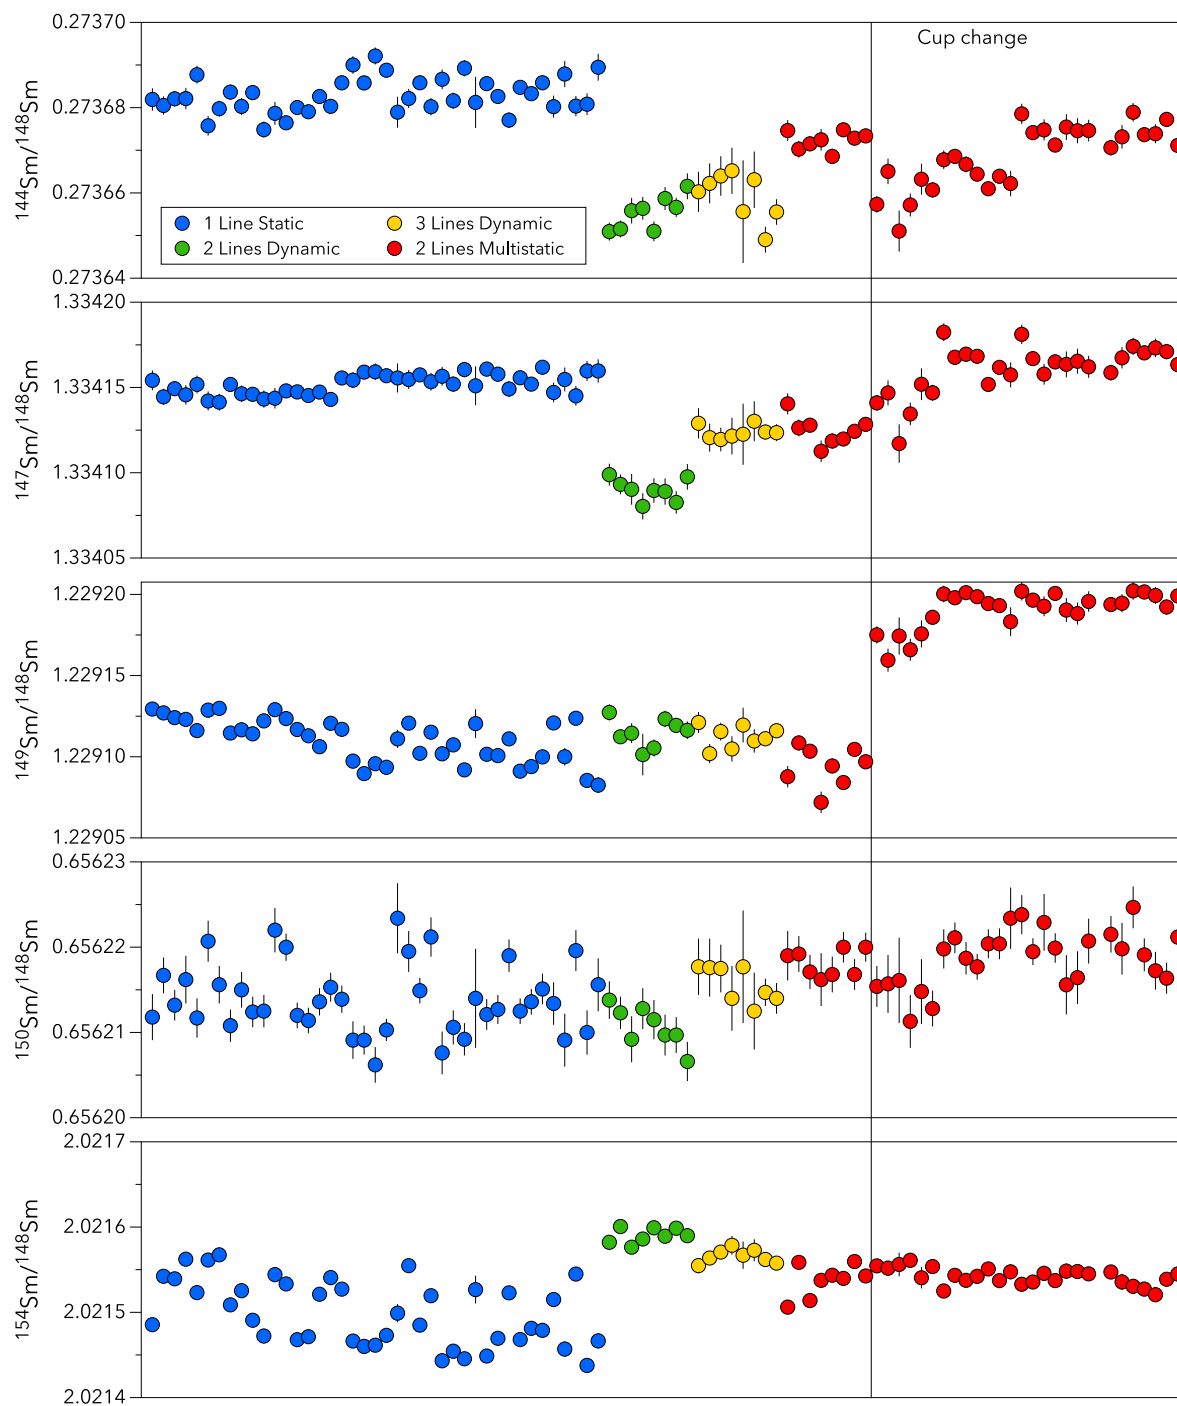

Figure S1: Comparison of the Sm isotope composition of the methods tested in this study. The Sm isotope compositions of the Sm ICP ETH standard are normalised to the fixed  $^{152}\text{Sm}/^{148}\text{Sm}$  ratio of 2.37689.

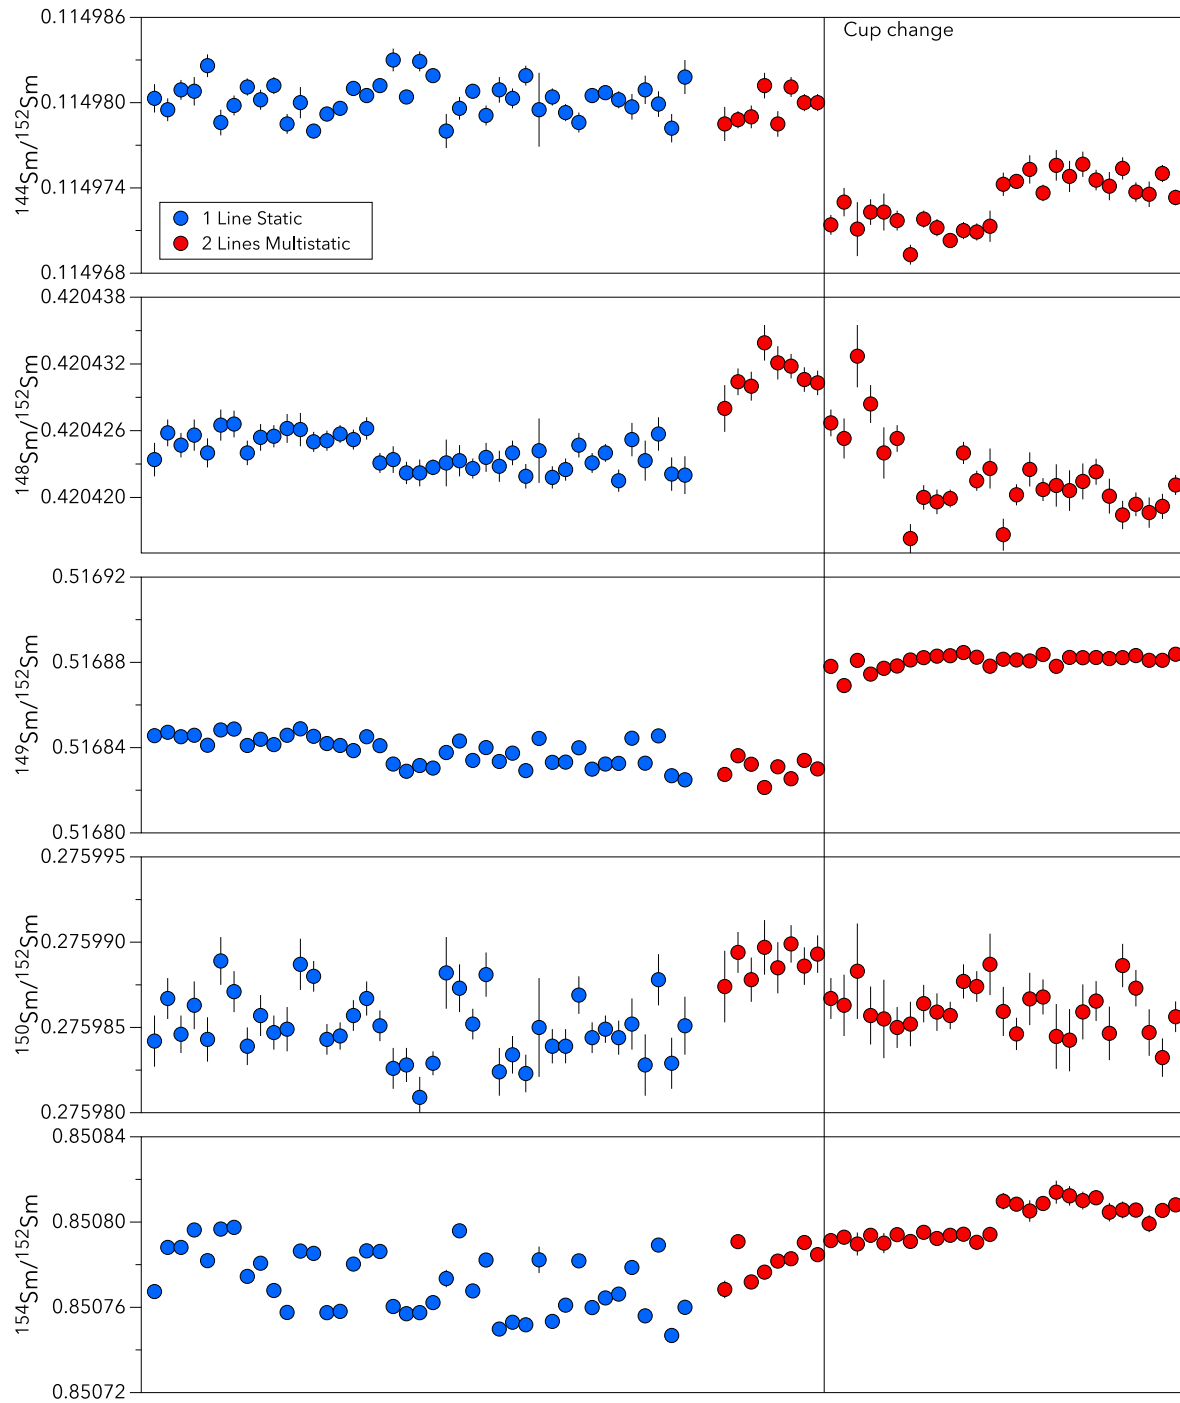

Figure S2: Comparison of the Sm isotope composition of the methods tested in this study. The Sm isotope compositions of the Sm ICP ETH standard are normalised to the fixed  $^{147}\text{Sm}/^{152}\text{Sm}$  ratio of 0.56081.
