# Supplementary material for: High-precision Sm isotope analysis by thermal ionisation mass spectrometry for large meteorite samples (>1 g)
Source: Royal Society of Chemistry journal article supplement (doi:10.1039/d4ja00301b), 2024-11-18
Supplement: d4ja00301b2.xlsx [file d4ja00301b2.xlsx]

## Sheet: 1. Static 147Sm-152Sm
Static method - corrected for mass fractionation with 147Sm/152Sm=0.56081
Date	Barrel	Filament	Sample	Session	Method	Mass (ng)	Loading	EVAP	IONI	I152Sm (V)	cycles	144Sm/152Sm	2 SE	2 RSE (ppm)	148Sm/152Sm	2 SE	2 RSE (ppm)	149Sm/152Sm	2 SE	2 RSE (ppm)	150Sm/152Sm	2 SE	2 RSE (ppm)	154Sm/152Sm	2 SE	2 RSE (ppm)	147Sm/152Sm	2 SE	144Nd/144Sm	152Gd/152Sm		Efficiency (%)
20220504	PF001	F02	Sm ICP ETH	Session #1	Static	200	no activator	1.6 mil	1.6 mil	1.79466	520	0.11498	9.66443e-07	8.4053	0.420423	1.46921e-06	3.4946	0.516846	1.6189e-06	3.13227	0.275984	1.10216e-06	3.99357	0.850767	2.97847e-06	3.50092	0.563326	0.000178568	7.13762e-06	7.59027e-06		0.00235533
20220504	PF001	F03	Sm ICP ETH	Session #1	Static	200	no activator	1.6 mil	1.6 mil	1.46717	1200	0.11498	8.18646e-07	7.11993	0.420426	1.17521e-06	2.79529	0.516847	1.25047e-06	2.41941	0.275987	9.03365e-07	3.27322	0.850788	2.46263e-06	2.89453	0.563687	0.000128203	8.45564e-06	9.15854e-06		0.00549191
20220505	PF001	F04	Sm ICP ETH	Session #1	Static	200	no activator	1.6 mil	1.6 mil	1.43538	1440	0.114981	6.73252e-07	5.85534	0.420425	1.06283e-06	2.52799	0.516845	1.10491e-06	2.13781	0.275985	7.51902e-07	2.72444	0.850788	2.07173e-06	2.43507	0.564265	0.000102034	1.17772e-05	4.32437e-06		0.00662923
20220505	PF001	F08	Sm ICP ETH	Session #1	Static	200	no activator	1.6 mil	1.6 mil	1.35859	720	0.114981	1.01143e-06	8.79652	0.420426	1.44467e-06	3.4362	0.516846	1.61863e-06	3.13175	0.275986	1.14236e-06	4.13921	0.850796	2.97439e-06	3.49601	0.563149	0.00020511	5.14821e-06	1.31281e-05		0.0032572
20220505	PF001	F09	Sm ICP ETH	Session #1	Static	200	H3PO4	1.6 mil	1.6 mil	1.90939	660	0.114983	7.85902e-07	6.83496	0.420424	1.30525e-06	3.10461	0.516841	1.39116e-06	2.69165	0.275984	9.32302e-07	3.3781	0.850782	2.67084e-06	3.13927	0.563897	7.54996e-05	5.71418e-06	2.80459e-06		0.0029862
20220507	PF002	F09	Sm ICP ETH	Session #1	Static	200	no activator	1.6 mil	1.6 mil	1.48887	760	0.114979	9.0825e-07	7.8993	0.420426	1.39565e-06	3.3196	0.516848	1.51726e-06	2.9356	0.275989	9.7202e-07	3.52195	0.850797	2.60966e-06	3.06732	0.564128	0.000171751	8.29939e-06	7.02981e-06		0.00345477
20220507	PF002	F10	Sm ICP ETH	Session #1	Static	200	no activator	1.6 mil	1.6 mil	3.2725	440	0.11498	7.12129e-07	6.19351	0.420427	1.24101e-06	2.95179	0.516849	1.3542e-06	2.62012	0.275987	9.07177e-07	3.28703	0.850797	2.5238e-06	2.96639	0.564255	0.000179601	4.857e-06	3.35721e-06		0.00295407
20220508	PF002	F11	Sm ICP ETH	Session #1	Static	200	no activator	1.6 mil	1.6 mil	3.19157	600	0.114981	6.21709e-07	5.40706	0.420424	1.06504e-06	2.53326	0.516841	1.10889e-06	2.14551	0.275984	7.88223e-07	2.85605	0.850775	2.04796e-06	2.40717	0.563877	0.000166577	2.94182e-06	2.82843e-06		0.00271666
20220508	PF002	F12	Sm ICP ETH	Session #1	Static	200	no activator	1.6 mil	1.6 mil	4.41215	320	0.11498	6.76215e-07	5.88114	0.420425	1.23954e-06	2.9483	0.516844	1.28371e-06	2.48375	0.275986	8.93796e-07	3.23856	0.850781	2.31734e-06	2.72378	0.563437	0.000198103	3.71658e-06	5.44301e-06		0.00143015
20220508	PF002	F14	Sm ICP ETH	Session #1	Static	200	no activator	1.6 mil	1.6 mil	3.81743	500	0.114981	5.85418e-07	5.09142	0.420425	1.0291e-06	2.44775	0.516841	1.12047e-06	2.16791	0.275985	7.64489e-07	2.77004	0.850768	2.11639e-06	2.48762	0.563637	0.000163233	3.31408e-06	3.83383e-06		0.00255188
20220509	PF002	F16	Sm ICP ETH	Session #1	Static	200	H3PO4	1.6 mil	1.6 mil	4.32685	360	0.114978	6.54494e-07	5.69231	0.420426	1.25143e-06	2.97657	0.516846	1.3011e-06	2.51739	0.275985	8.0719e-07	2.92476	0.850758	2.19815e-06	2.58376	0.564403	0.000322064	2.81129e-06	4.01606e-06		0.0018993
20220908	PF004	F01	Sm ICP ETH	Session #3	Static	200	H3PO4	1.6 mil	1.6 mil	1.2803	900	0.11498	1.08229e-06	9.41289	0.420426	1.50258e-06	3.57394	0.516849	1.53783e-06	2.9754	0.275989	1.05556e-06	3.82463	0.850786	2.8801e-06	3.38522	0.565594	0.000220943	4.83448e-06	6.05881e-06		0.00409584
20220909	PF004	F02	Sm ICP ETH	Session #3	Static	300	H3PO4	1.6 mil	1.6 mil	3.42416	780	0.114978	5.29257e-07	4.60311	0.420425	8.97305e-07	2.13428	0.516845	1.01761e-06	1.96889	0.275988	6.32115e-07	2.29037	0.850785	1.79417e-06	2.10884	0.565747	0.000209827	5.01766e-06	3.06474e-06		0.00273269
20220909	PF004	F09	Sm ICP ETH	Session #3	Static	300	H3PO4	1.6 mil	1.6 mil	5.15194	560	0.114979	5.22263e-07	4.54223	0.420425	9.3107e-07	2.21459	0.516842	1.0356e-06	2.00371	0.275984	6.11831e-07	2.21691	0.850757	1.9077e-06	2.24235	0.563521	0.000362401	3.26712e-06	3.18755e-06		0.001686
20220909	PF004	F10	Sm ICP ETH	Session #3	Static	300	H3PO4	1.6 mil	1.6 mil	3.46896	900	0.11498	5.18035e-07	4.50546	0.420426	8.15476e-07	1.93964	0.516841	9.11779e-07	1.76414	0.275985	5.91347e-07	2.14268	0.850758	1.75216e-06	2.05952	0.563773	0.000267336	3.31841e-06	2.43133e-06		0.0028512
20220910	PF004	F11	Sm ICP ETH	Session #3	Static	300	no activator	1.6 mil	1.6 mil	3.22914	840	0.114981	5.20307e-07	4.52515	0.420425	8.92901e-07	2.1238	0.516839	1.01418e-06	1.96228	0.275986	6.39434e-07	2.31691	0.85078	2.00462e-06	2.35622	0.563964	0.000131712	4.50517e-06	3.86009e-06		0.00264256
20220911	PF004	F12	Sm ICP ETH	Session #3	Static	300	no activator	1.6 mil	1.6 mil	3.92168	600	0.11498	5.36356e-07	4.66476	0.420426	9.65459e-07	2.29638	0.516845	1.03206e-06	1.99684	0.275987	6.91053e-07	2.50393	0.850787	2.0205e-06	2.37487	0.563542	0.000158859	9.87909e-05	0.000407611		0.00181247
20220913	PF005	F01	Sm ICP ETH	Session #3	Static	300	no activator	1.6 mil	1.6 mil	2.85782	900	0.114981	5.27231e-07	4.58537	0.420423	9.1041e-07	2.16546	0.516841	9.79468e-07	1.8951	0.275985	6.48674e-07	2.3504	0.850786	1.78456e-06	2.09754	0.564258	0.000100003	3.40417e-06	2.85409e-06		0.00273056
20230130	PF008	F15	Sm ICP ETH	Session #4	Static	300	no activator	1.0 mil	1.0 mil	4.23176	660	0.114983	7.81045e-07	6.7927	0.420423	1.1678e-06	2.77768	0.516832	1.29498e-06	2.50562	0.275983	8.96131e-07	3.24706	0.85076	2.49025e-06	2.92709	0.563857	7.47293e-05	1.8129e-06	1.79683e-06		0.00209114
20230131	PF008	F03	Sm ICP ETH	Session #4	Static	300	no activator	1.6 mil	1.0 mil	5.41902	800	0.11498	5.4887e-07	4.77359	0.420422	9.78414e-07	2.32722	0.516829	1.07421e-06	2.07847	0.275983	7.0095e-07	2.53983	0.850757	1.86718e-06	2.19472	0.564598	8.2671e-05	2.00582e-06	1.71177e-06		0.00253435
20230205	PF009	F01	Sm ICP ETH	Session #4	Static	300	no activator	1.0 mil	1.0 mil	4.14102	700	0.114983	7.445e-07	6.47487	0.420422	1.23411e-06	2.9354	0.516832	1.32311e-06	2.56004	0.275981	8.72858e-07	3.16275	0.850757	2.39421e-06	2.81421	0.563438	0.000141016	1.93836e-06	2.71704e-06		0.0022008
20230206	PF009	F02	Sm ICP ETH	Session #4	Static	300	no activator	1.0 mil	1.0 mil	6.75696	1100	0.114982	4.34628e-07	3.77997	0.420423	7.21521e-07	1.71618	0.51683	7.97138e-07	1.54236	0.275983	5.3173e-07	1.92668	0.850762	1.52221e-06	1.78923	0.564615	9.8779e-05	1.96671e-06	1.28764e-06		0.00355404
20230207	PF009	F03	Sm ICP ETH	Session #4	Static	300	no activator	1.0 mil	1.0 mil	3.9399	240	0.114978	1.23364e-06	10.7294	0.420423	2.14719e-06	5.10721	0.516838	2.21145e-06	4.27881	0.275988	1.60785e-06	5.82581	0.850774	4.05948e-06	4.77151	0.562371	0.000273068	4.41711e-06	1.8842e-06		0.000734691
20230207	PF009	F08	Sm ICP ETH	Session #4	Static	300	no activator	1.0 mil	1.0 mil	6.06165	400	0.11498	7.86161e-07	6.83739	0.420423	1.39539e-06	3.31901	0.516843	1.42148e-06	2.75032	0.275987	9.67613e-07	3.506	0.850796	2.65656e-06	3.12244	0.56425	0.000273477	2.80494e-06	1.82276e-06		0.001246
20230207	PF009	F09	Sm ICP ETH	Session #4	Static	300	no activator	1.0 mil	1.0 mil	6.51853	900	0.114981	5.05653e-07	4.39771	0.420423	8.71365e-07	2.07259	0.516834	8.62592e-07	1.66899	0.275985	6.40595e-07	2.32112	0.850768	1.69092e-06	1.98752	0.563692	0.00013455	2.17939e-06	1.85526e-06		0.00286645
20230208	PF009	F10	Sm ICP ETH	Session #4	Static	300	no activator	1.0 mil	1.0 mil	4.86254	500	0.114979	7.27844e-07	6.33022	0.420424	1.2978e-06	3.08688	0.51684	1.47811e-06	2.8599	0.275988	9.18133e-07	3.32671	0.850782	2.68848e-06	3.16001	0.563499	0.000169958	3.13915e-06	3.27931e-06		0.00158081
20230208	PF009	F11	Sm ICP ETH	Session #4	Static	300	no activator	1.0 mil	1.0 mil	5.07887	420	0.114981	8.65813e-07	7.53005	0.420423	1.36995e-06	3.25851	0.516834	1.52211e-06	2.94506	0.275982	9.94519e-07	3.60356	0.85075	2.58156e-06	3.03446	0.564293	0.000194878	2.04834e-06	1.28954e-06		0.0013067
20230208	PF009	F12	Sm ICP ETH	Session #4	Static	300	no activator	1.0 mil	1.0 mil	5.02987	600	0.11498	7.33852e-07	6.38241	0.420424	1.12805e-06	2.68313	0.516837	1.347e-06	2.60623	0.275983	8.3433e-07	3.02312	0.850753	2.25453e-06	2.65005	0.56322	0.000130568	1.83661e-06	2.09334e-06		0.00197817
20230131	PF008	F12	B6 column cut	Session #4	Static	300	no activator	1.6 mil	1.0 mil	5.42089	640	0.114983	6.2437e-07	5.43011	0.420422	1.08374e-06	2.57774	0.516824	1.12581e-06	2.17832	0.275984	7.60499e-07	2.7556	0.850761	1.99322e-06	2.34287	0.564701	9.82527e-05	1.73758e-06	6.14156e-05		0.00934651
20230201	PF008	F11	B5 column cut	Session #4	Static	184	no activator	1.0 mil	1.0 mil	2.10171	860	0.114985	1.04636e-06	9.09998	0.420419	1.61369e-06	3.83829	0.516815	1.72381e-06	3.33544	0.275978	1.19661e-06	4.33587	0.85075	2.97601e-06	3.4981	0.564509	0.000107829	3.46069e-06	0.000784719		0.00793916
20230201	PF008	F13	B7 column cut	Session #4	Static	300	no activator	1.6 mil	1.0 mil	4.29026	900	0.114977	6.2299e-07	5.4184	0.420427	1.0034e-06	2.38661	0.516841	1.07867e-06	2.08704	0.275988	7.40618e-07	2.68352	0.85077	1.99758e-06	2.34797	0.564659	0.000105979	2.1954e-06	5.20872e-05		0.0104022
20230202	PF008	F14	B8 column cut	Session #4	Static	106	no activator	1.0 mil	1.0 mil	1.59243	240	0.11497	2.42543e-06	21.0962	0.420431	3.00027e-06	7.13617	0.516856	3.60614e-06	6.97706	0.275992	2.29139e-06	8.30236	0.850804	6.47073e-06	7.60543	0.563598	0.000212097	5.17413e-06	0.000174066		0.00291397
20230306	PF012	F01	Sm ICP ETH	Session #5	Static	300	no activator	1.6 mil	1.6 mil	3.77788	900	0.114982	7.22694e-07	6.28528	0.420422	1.12445e-06	2.67457	0.516829	1.18571e-06	2.29419	0.275982	8.36449e-07	3.03081	0.850752	2.22052e-06	2.61007	0.5653	0.000132234	2.93138e-06	3.68963e-06		0.00284178
20230306	PF012	F02	Sm ICP ETH	Session #5	Static	300	no activator	1.6 mil	1.6 mil	2.23996	460	0.114979	2.62177e-06	22.8021	0.420424	2.86427e-06	6.81281	0.516844	3.19747e-06	6.18652	0.275985	2.47527e-06	8.96885	0.850782	6.1563e-06	7.23604	0.56185	0.000209201	8.92939e-06	1.23742e-05		0.00142763
20230307	PF012	F03	Sm ICP ETH	Session #5	Static	300	no activator	1.6 mil	1.6 mil	4.68779	800	0.11498	6.39423e-07	5.56115	0.420422	1.03531e-06	2.46255	0.516833	1.13748e-06	2.20087	0.275984	7.39775e-07	2.6805	0.850753	2.10364e-06	2.47268	0.56318	0.000176814	3.25786e-06	2.27447e-06		0.00251007
20230308	PF012	F08	Sm ICP ETH	Session #5	Static	300	no activator	1.6 mil	1.6 mil	4.54978	900	0.114979	5.94702e-07	5.17225	0.420423	1.00989e-06	2.40208	0.516833	1.06473e-06	2.06011	0.275984	7.0258e-07	2.54573	0.850761	1.96274e-06	2.30704	0.565198	0.000137313	3.86781e-06	1.84909e-06		0.00286334
20230308	PF012	F09	Sm ICP ETH	Session #5	Static	300	no activator	1.6 mil	1.6 mil	3.90996	900	0.114979	6.62303e-07	5.76022	0.420425	1.14931e-06	2.73368	0.51684	1.27973e-06	2.47607	0.275987	7.73267e-07	2.80182	0.850782	2.35711e-06	2.77053	0.563074	0.000153133	4.46104e-06	4.72774e-06		0.00286373
20230308	PF012	F10	Sm ICP ETH	Session #5	Static	300	no activator	1.6 mil	1.6 mil	6.43555	852	0.114981	4.96114e-07	4.31477	0.420423	8.52372e-07	2.02742	0.51683	9.48957e-07	1.83611	0.275984	6.32821e-07	2.29296	0.85076	1.77818e-06	2.09011	0.565506	9.90666e-05	3.51371e-06	2.55992e-06		0.00270916
20230309	PF012	F11	Sm ICP ETH	Session #5	Static	300	no activator	1.6 mil	1.6 mil	6.35296	900	0.114981	5.33291e-07	4.63809	0.420424	8.34497e-07	1.98489	0.516832	9.46195e-07	1.83076	0.275985	6.09634e-07	2.20894	0.850764	1.74017e-06	2.04542	0.565036	8.27686e-05	2.83661e-06	2.04474e-06		0.00286217
20230312	PF013	F01	Sm ICP ETH	Session #5	Static	300	no activator	1.6 mil	1.6 mil	5.74906	720	0.11498	6.18205e-07	5.37662	0.420422	1.02267e-06	2.43248	0.516833	1.0855e-06	2.10028	0.275984	7.5811e-07	2.74693	0.850766	1.90812e-06	2.24283	0.563663	0.000140682	3.94893e-06	3.1227e-06		0.00226879
20230313	PF013	F02	Sm ICP ETH	Session #5	Static	300	no activator	1.6 mil	1.6 mil	2.96058	660	0.11498	8.95932e-07	7.79208	0.420425	1.46676e-06	3.48874	0.516844	1.62441e-06	3.14294	0.275985	1.01336e-06	3.67179	0.850779	2.91567e-06	3.42706	0.56336	0.000171388	3.55003e-06	7.23012e-06		0.00209347
20230313	PF013	F03	Sm ICP ETH	Session #5	Static	300	no activator	1.6 mil	1.6 mil	4.5422	280	0.114981	1.01175e-06	8.79929	0.420423	1.75112e-06	4.16514	0.516833	1.94023e-06	3.75408	0.275983	1.25005e-06	4.52945	0.850756	3.38415e-06	3.97782	0.56407	0.000162473	2.87607e-06	3.70677e-06		0.000868732
20230315	PF013	F08	Sm ICP ETH	Session #5	Static	300	no activator	1.6 mil	1.6 mil	2.66815	900	0.11498	8.83402e-07	7.6831	0.420426	1.46399e-06	3.48217	0.516846	1.3786e-06	2.66733	0.275988	1.00455e-06	3.63984	0.850789	2.69915e-06	3.17253	0.564806	0.000169977	4.94453e-06	5.40112e-06		0.00284586
20230317	PF013	F09	Sm ICP ETH	Session #5	Static	300	no activator	1.6 mil	1.6 mil	2.13429	900	0.114978	9.61834e-07	8.36535	0.420422	1.46967e-06	3.4957	0.516827	1.67626e-06	3.24337	0.275983	1.09623e-06	3.97208	0.850747	2.83909e-06	3.33717	0.565109	0.000124832	4.25821e-06	5.43687e-06		0.00281147
20230317	PF013	F10	Sm ICP ETH	Session #5	Static	300	no activator	1.6 mil	1.6 mil	1.65854	900	0.114982	1.20795e-06	10.5056	0.420422	1.6975e-06	4.0376	0.516825	1.87081e-06	3.61981	0.275985	1.31968e-06	4.7817	0.85076	3.51629e-06	4.13311	0.563913	0.000135433	4.58235e-06	4.44286e-06		0.00280506
20230314	PF013	F16	BCR-2	Session #5	Static	180	no activator	1.6 mil	1.6 mil	2.68169	740	0.114978	1.13152e-06	9.84124	0.420423	1.71245e-06	4.07316	0.516844	1.88662e-06	3.65028	0.275982	1.27595e-06	4.6233	0.850749	3.52933e-06	4.1485	0.562983	0.000175873	0.000145428	1.44368e-05		0.00392427
20230315	PF013	F17	BHVO-2 #1	Session #5	Static	217	no activator	1.6 mil	1.6 mil	2.99868	620	0.11498	1.01098e-06	8.79261	0.420424	1.53608e-06	3.65364	0.516835	1.61632e-06	3.12734	0.275985	1.1371e-06	4.12015	0.850765	2.89513e-06	3.40297	0.56392	5.07149e-05	1.87189e-05	1.75979e-05		0.00269909
20230315	PF013	F18	DNC-1	Session #5	Static	220	no activator	1.6 mil	1.6 mil	3.81656	260	0.114978	1.2674e-06	11.023	0.420423	1.87582e-06	4.46175	0.516846	2.06429e-06	3.99402	0.275989	1.42254e-06	5.15434	0.850771	3.92319e-06	4.61134	0.565926	0.000270448	3.81592e-06	1.20093e-06		0.00109947
20230316	PF013	F19	W-2a	Session #5	Static	163	no activator	1.6 mil	1.6 mil	2.16758	400	0.114981	1.7462e-06	15.1869	0.420423	2.13359e-06	5.07486	0.516843	2.44576e-06	4.73212	0.275986	1.58653e-06	5.74859	0.850787	4.42024e-06	5.19548	0.564099	0.000161265	5.21988e-06	2.49372e-06		0.00227644
20230316	PF013	F20	BIR-1 #1	Session #5	Static	373	no activator	1.6 mil	1.6 mil	6.11385	500	0.114978	7.06908e-07	6.14821	0.420424	1.14638e-06	2.72673	0.516836	1.29182e-06	2.49947	0.275987	8.16826e-07	2.95965	0.85077	2.44734e-06	2.87662	0.563292	0.000243508	5.30559e-06	5.57952e-06		0.00125815
20230317	PF013	F21	BIR-1 #2	Session #5	Static	358	no activator	1.6 mil	1.6 mil	5.77237	320	0.114979	8.73749e-07	7.5992	0.420423	1.39022e-06	3.30672	0.51683	1.56939e-06	3.03657	0.275986	1.08841e-06	3.94372	0.850752	3.0284e-06	3.55968	0.564937	0.000270732	1.59432e-06	1.12917e-06		0.000812802

## Sheet: 2. Multistatic 147Sm-152Sm
Multistatic method - corrected for mass fractionation with 147Sm/152Sm=0.56081
												L1			L1			L1			L1			L1			L1		L2			L2			L2			L2			L2		Multistatic			Multistatic			Multistatic
Date	Barrel	Filament	Sample	Session	Method	Mass (ng)	Loading	EVAP	IONI	I152Sm (V)	n	144Sm/152Sm	2 SE	2 RSE (ppm)	148Sm/152Sm	2 SE	2 RSE (ppm)	149Sm/152Sm	2 SE	2 RSE (ppm)	150Sm/152Sm	2 SE	2 RSE (ppm)	154Sm/152Sm	2 SE	2 RSE (ppm)	147Sm/152Sm	2 SE	144Sm/152Sm	2 SE	2 RSE (ppm)	148Sm/152Sm	2 SE	2 RSE (ppm)	150Sm/152Sm	2 SE	2 RSE (ppm)	154Sm/152Sm	2 SE	2 RSE (ppm)	147Sm/152Sm	2 SE	144Sm/152Sm	2 SE	2 RSE (ppm)	148Sm/152Sm	2 SE	2 RSE (ppm)	150Sm/152Sm
20230107	PF007	F01	Sm ICP ETH	Session #4	Multistatic	300	no activator	1.6 mil	1.6 mil	1.98964	460	0.114981	1.51615e-06	13.1861	0.42042	2.58811e-06	6.15602	0.516825	2.90868e-06	5.62798	0.275981	1.86521e-06	6.75848	0.850757	4.6686e-06	5.48758	0.565987	0.000242156	0.114979	1.4791e-06	12.8641	0.420436	2.48482e-06	5.9101	0.275995	1.95761e-06	7.09292	0.850781	5.00125e-06	5.87842	0.565969	0.00024086	0.11498	1.18947e-06	10.3451	0.420428	1.84387e-06	4.38569	0.275988
20230124	PF007	F02	Sm ICP ETH	Session #4	Multistatic	300	no activator	1.6 mil	1.6 mil	4.29058	380	0.11498	1.09655e-06	9.53682	0.420422	1.87775e-06	4.46636	0.516836	1.92697e-06	3.72839	0.275987	1.34847e-06	4.88599	0.850773	3.83657e-06	4.50951	0.563409	0.000352724	0.114979	1.26194e-06	10.9753	0.420439	2.05821e-06	4.8954	0.275992	1.37386e-06	4.97791	0.85081	3.76536e-06	4.42562	0.563409	0.000334259	0.11498	8.91632e-07	7.75468	0.42043	1.51465e-06	3.60263	0.275989
20230109	PF007	F08	Sm ICP ETH	Session #4	Multistatic	300	no activator	1.6 mil	1.0 mil	3.38276	540	0.11498	9.55084e-07	8.30653	0.420421	1.46244e-06	3.4785	0.516832	1.67135e-06	3.23383	0.275983	1.05559e-06	3.82483	0.85076	3.08069e-06	3.6211	0.565909	0.000166328	0.114981	9.91048e-07	8.61926	0.420439	1.46471e-06	3.48375	0.275994	1.17939e-06	4.27324	0.850786	3.09956e-06	3.64317	0.565898	0.000165809	0.11498	7.37754e-07	6.41635	0.42043	1.08778e-06	2.5873	0.275989
20230109	PF007	F09	Sm ICP ETH	Session #4	Multistatic	300	no activator	1.6 mil	1.0 mil	3.30041	270	0.114982	1.26513e-06	11.0029	0.420421	2.21561e-06	5.26998	0.516821	2.41706e-06	4.67679	0.275986	1.54632e-06	5.6029	0.850775	4.55287e-06	5.35144	0.565604	0.000308623	0.114984	1.428e-06	12.4191	0.420447	2.33919e-06	5.56357	0.275993	1.83575e-06	6.65143	0.850779	4.35731e-06	5.12156	0.565567	0.000308176	0.114983	1.00021e-06	8.69874	0.420434	1.63243e-06	3.88273	0.27599
20230110	PF007	F10	Sm ICP ETH	Session #4	Multistatic	300	no activator	1.6 mil	1.0 mil	2.9868	460	0.11498	1.05934e-06	9.21329	0.420423	1.82026e-06	4.32959	0.51683	2.01901e-06	3.90652	0.275985	1.34188e-06	4.86216	0.850777	3.78358e-06	4.44721	0.565561	0.000252316	0.11498	1.12561e-06	9.78962	0.420441	1.90505e-06	4.53108	0.275993	1.53716e-06	5.56956	0.850785	3.67086e-06	4.31468	0.565536	0.000252086	0.11498	8.35853e-07	7.26952	0.420433	1.30918e-06	3.11389	0.275989
20230123	PF007	F11	Sm ICP ETH	Session #4	Multistatic	300	no activator	1.0 mil	1.0 mil	4.65779	540	0.114983	8.06711e-07	7.01594	0.420421	1.34144e-06	3.19071	0.516825	1.47925e-06	2.86218	0.275983	1.00541e-06	3.64302	0.850756	2.82394e-06	3.31933	0.563913	0.000131633	0.114983	8.63631e-07	7.51096	0.420443	1.36505e-06	3.24669	0.275998	1.14672e-06	4.15482	0.850807	2.77332e-06	3.25963	0.563902	0.000130646	0.114982	5.6402e-07	4.90527	0.420432	9.2747e-07	2.20599	0.275991
20230123	PF007	F12	Sm ICP ETH	Session #4	Multistatic	300	no activator	1.0 mil	1.0 mil	4.45588	540	0.114982	7.82845e-07	6.80844	0.420422	1.34791e-06	3.20608	0.516834	1.44626e-06	2.7983	0.275987	9.73676e-07	3.52798	0.850773	2.65468e-06	3.12031	0.563503	0.000141948	0.114982	7.72261e-07	6.71638	0.420441	1.33499e-06	3.17523	0.275992	1.08313e-06	3.92449	0.850809	2.52232e-06	2.96462	0.563488	0.000141587	0.114982	5.55254e-07	4.82906	0.420431	9.40819e-07	2.23775	0.275989
20230124	PF007	F13	Sm ICP ETH	Session #4	Multistatic	300	no activator	1.0 mil	1.0 mil	5.08149	540	0.11498	7.68011e-07	6.67951	0.420419	1.31269e-06	3.12235	0.51683	1.39261e-06	2.69452	0.275982	8.98585e-07	3.25595	0.850753	2.5013e-06	2.9401	0.566012	0.000162636	0.114981	7.35675e-07	6.39822	0.420442	1.24247e-06	2.95515	0.275997	1.04977e-06	3.80355	0.850815	2.48652e-06	2.92251	0.566008	0.000162467	0.114981	5.82122e-07	5.06278	0.42043	9.46288e-07	2.25076	0.27599
20230701	PF014	F02	Sm ICP ETH	Session #6	Multistatic	300	no activator	1.2 mil	1.2 mil	2.76053	540	0.114979	9.82106e-07	8.54158	0.420437	1.7757e-06	4.22347	0.516878	2.06891e-06	4.00271	0.27599	1.30181e-06	4.71686	0.850774	3.27845e-06	3.85348	0.564199	0.000108106	0.114968	1.0509e-06	9.14074	0.420419	1.72932e-06	4.11334	0.275984	1.2576e-06	4.55679	0.850807	3.78287e-06	4.44621	0.564232	0.000107986	0.114974	7.49146e-07	6.5158	0.420427	1.1873e-06	2.82403	0.275987
20230702	PF014	F03	Sm ICP ETH	Session #6	Multistatic	300	no activator	1.2 mil	1.2 mil	1.67446	400	0.11498	1.55143e-06	13.493	0.420433	2.67352e-06	6.35895	0.51687	2.7752e-06	5.36925	0.27599	1.96852e-06	7.13258	0.850779	4.94905e-06	5.81707	0.564411	0.000214727	0.114973	1.54147e-06	13.4073	0.42042	2.51815e-06	5.98961	0.275985	1.88811e-06	6.84134	0.850807	5.08336e-06	5.97475	0.564433	0.000214434	0.114977	1.13818e-06	9.89924	0.420426	1.79279e-06	4.26422	0.275988
20230702	PF014	F08	Sm ICP ETH	Session #6	Multistatic	300	no activator	1.2 mil	1.2 mil	1.06351	260	0.114982	2.74803e-06	23.8997	0.42044	4.3607e-06	10.3718	0.516879	4.48102e-06	8.66939	0.275992	3.4245e-06	12.408	0.85076	6.95803e-06	8.1786	0.565214	0.000213952	0.114966	2.83771e-06	24.683	0.420424	4.01414e-06	9.54785	0.275988	3.0869e-06	11.1849	0.850813	8.45467e-06	9.93717	0.565253	0.000213868	0.114974	2.12603e-06	18.4914	0.420433	2.94702e-06	7.00948	0.27599
20230702	PF014	F09	Sm ICP ETH	Session #6	Multistatic	300	no activator	1.2 mil	1.2 mil	3.24494	260	0.11498	1.47828e-06	12.8569	0.420436	2.49386e-06	5.9316	0.516874	2.53618e-06	4.90677	0.27599	1.7437e-06	6.31798	0.850776	5.02687e-06	5.90857	0.564344	0.000293884	0.11497	1.34108e-06	11.6647	0.420422	2.27079e-06	5.40122	0.275982	1.75574e-06	6.36179	0.850807	4.86971e-06	5.72364	0.564369	0.000293402	0.114975	1.02161e-06	8.88551	0.420429	1.71027e-06	4.06793	0.275987
20230703	PF014	F10	Sm ICP ETH	Session #6	Multistatic	300	no activator	1.2 mil	1.2 mil	2.59855	240	0.114982	1.55451e-06	13.5197	0.420434	2.64584e-06	6.29312	0.516875	2.73511e-06	5.29163	0.275987	1.94857e-06	7.06038	0.850775	4.89909e-06	5.75839	0.563176	0.000275393	0.114969	1.53796e-06	13.3771	0.420414	2.474e-06	5.88467	0.275983	2.16934e-06	7.8604	0.850806	5.08824e-06	5.98049	0.563194	0.000274952	0.114975	1.08115e-06	9.4033	0.420424	1.82107e-06	4.3315	0.275985
20230703	PF014	F11	Sm ICP ETH	Session #6	Multistatic	300	no activator	1.2 mil	1.2 mil	3.73681	460	0.114979	8.8742e-07	7.71812	0.420433	1.58262e-06	3.76427	0.516878	1.82107e-06	3.5232	0.275987	1.2656e-06	4.58573	0.85078	3.0127e-06	3.5411	0.564092	0.000211422	0.114968	9.39126e-07	8.16861	0.420418	1.58203e-06	3.76299	0.275983	1.24212e-06	4.50072	0.850808	3.19814e-06	3.75894	0.564119	0.000210886	0.114973	7.05792e-07	6.13875	0.420426	1.17119e-06	2.78573	0.275985
20240207	PF016	F01	Sm ICP ETH	Session #7	Multistatic	300	no activator	1.2 mil	1.2 mil	3.32989	360	0.11498	1.09471e-06	9.52086	0.420429	1.7714e-06	4.21331	0.516881	1.95131e-06	3.77516	0.275988	1.36341e-06	4.9401	0.85078	3.96865e-06	4.66472	0.563672	0.000234019	0.114965	1.12481e-06	9.7839	0.420405	2.04046e-06	4.85355	0.275983	1.31726e-06	4.77298	0.850803	3.46915e-06	4.0775	0.563708	0.000234397	0.114972	8.08823e-07	7.03495	0.420417	1.30705e-06	3.10894	0.275986
20240207	PF016	F02	Sm ICP ETH	Session #7	Multistatic	300	no activator	1.2 mil	1.2 mil	3.73973	460	0.11498	8.45605e-07	7.35434	0.42043	1.53078e-06	3.64098	0.516882	1.62251e-06	3.13904	0.27599	1.0008e-06	3.62622	0.850779	2.83503e-06	3.33227	0.564089	0.000175735	0.114968	9.13192e-07	7.94301	0.42041	1.55864e-06	3.70742	0.275985	1.16491e-06	4.22093	0.85081	2.99349e-06	3.5184	0.564126	0.000175868	0.114974	6.16715e-07	5.36395	0.420421	1.06384e-06	2.53043	0.275987
20240208	PF016	F03	Sm ICP ETH	Session #7	Multistatic	300	no activator	1.2 mil	1.2 mil	3.06714	540	0.11498	8.79862e-07	7.65233	0.420431	1.49846e-06	3.5641	0.516883	1.62937e-06	3.15229	0.275988	1.17742e-06	4.26618	0.850779	3.10382e-06	3.64821	0.564658	0.000148635	0.114967	9.40356e-07	8.17934	0.42041	1.55042e-06	3.68788	0.275985	1.15315e-06	4.17832	0.850805	3.01408e-06	3.54262	0.564693	0.000148601	0.114974	6.77044e-07	5.8887	0.42042	1.07832e-06	2.56485	0.275987
20240208	PF016	F08	Sm ICP ETH	Session #7	Multistatic	300	no activator	1.2 mil	1.2 mil	2.74686	520	0.114981	1.04921e-06	9.1251	0.42043	1.76587e-06	4.20016	0.51688	1.72256e-06	3.33262	0.275988	1.31897e-06	4.7791	0.850778	3.19481e-06	3.75517	0.565303	6.72559e-05	0.114964	1.04982e-06	9.13177	0.42041	1.61504e-06	3.84157	0.275984	1.24916e-06	4.52618	0.850811	3.14319e-06	3.69434	0.565347	6.73295e-05	0.114972	7.76194e-07	6.75115	0.420419	1.1781e-06	2.8022	0.275986
20240209	PF016	F10	Sm ICP ETH	Session #7	Multistatic	300	no activator	1.2 mil	1.2 mil	4.06235	540	0.114981	7.93196e-07	6.89851	0.420435	1.35558e-06	3.22423	0.516885	1.49192e-06	2.88636	0.275992	9.20952e-07	3.33688	0.85078	2.76862e-06	3.25421	0.564989	8.41507e-05	0.114967	7.80865e-07	6.79209	0.420414	1.32906e-06	3.16132	0.275985	1.01103e-06	3.66336	0.850808	2.70064e-06	3.1742	0.565029	8.42343e-05	0.114974	5.97991e-07	5.2011	0.420425	9.60575e-07	2.28477	0.275988
20240210	PF016	F19	Sm ICP ETH	Session #7	Multistatic	300	no activator	1.2 mil	1.2 mil	5.42482	380	0.11498	7.87898e-07	6.85246	0.420433	1.38287e-06	3.28916	0.516882	1.53549e-06	2.97068	0.275989	1.00492e-06	3.64118	0.850775	2.6788e-06	3.14866	0.563752	0.000217415	0.114967	8.24071e-07	7.16791	0.420412	1.44606e-06	3.43962	0.275987	1.08017e-06	3.91386	0.850806	2.73033e-06	3.20911	0.563787	0.0002172	0.114974	5.85795e-07	5.09504	0.420423	1.00127e-06	2.38157	0.275988
20240212	PF016	F21	Sm ICP ETH	Session #7	Multistatic	300	no activator	1.2 mil	1.2 mil	3.40469	178	0.114981	1.87498e-06	16.3069	0.420433	2.99285e-06	7.11849	0.516878	2.81868e-06	5.45328	0.275992	2.26657e-06	8.21244	0.850782	5.90994e-06	6.94649	0.562586	0.000325791	0.114968	1.84258e-06	16.027	0.420414	2.74529e-06	6.52996	0.275988	2.25323e-06	8.16423	0.850808	5.47541e-06	6.43555	0.56262	0.000323686	0.114975	1.35066e-06	11.7474	0.420423	1.9374e-06	4.60821	0.27599
20240212	PF016	F12	BE-N #1a	Session #7	Multistatic	300	no activator	1.2 mil	1.2 mil	4.48967	240	0.114978	1.06285e-06	9.24393	0.420432	1.82368e-06	4.33762	0.51689	2.12038e-06	4.10219	0.275989	1.41697e-06	5.13413	0.850787	3.93682e-06	4.62726	0.565481	9.8204e-05	0.114964	1.06154e-06	9.2336	0.420412	2.03483e-06	4.8401	0.275987	1.4704e-06	5.32777	0.850821	3.72425e-06	4.37724	0.565521	9.88201e-05	0.114971	7.73039e-07	6.72375	0.420422	1.41487e-06	3.36535	0.275989
20240212	PF016	F16	BE-N #1b	Session #7	Multistatic	300	no activator	1.2 mil	1.2 mil	2.50541	380	0.11498	1.22271e-06	10.6341	0.420436	2.15871e-06	5.13446	0.516895	2.26501e-06	4.38196	0.275993	1.48384e-06	5.37635	0.850791	4.22712e-06	4.96846	0.563795	0.000168436	0.114964	1.19781e-06	10.419	0.42041	1.94439e-06	4.62498	0.275988	1.56616e-06	5.67475	0.850819	4.11186e-06	4.83282	0.563833	0.000168455	0.114972	9.55872e-07	8.31397	0.420423	1.50023e-06	3.56838	0.27599
20240213	PF016	F17	BE-N #1c	Session #7	Multistatic	300	no activator	1.2 mil	1.2 mil	4.32286	600	0.114979	6.97016e-07	6.06214	0.420434	1.29446e-06	3.07885	0.516884	1.30078e-06	2.51657	0.275991	8.68932e-07	3.14841	0.85079	2.51044e-06	2.95071	0.563238	0.000168885	0.114965	6.92576e-07	6.02424	0.420413	1.25295e-06	2.98028	0.275986	9.51311e-07	3.44695	0.850815	2.50028e-06	2.93869	0.563274	0.000169066	0.114972	5.05349e-07	4.39542	0.420424	8.72409e-07	2.07507	0.275988
20240213	PF016	F14	Allende	Session #7	Multistatic	250	no activator	1.2 mil	1.2 mil	5.40461	420	0.114961	7.4464e-07	6.47732	0.420431	1.36514e-06	3.24701	0.516862	1.5999e-06	3.0954	0.276012	9.94299e-07	3.60237	0.850786	2.69408e-06	3.16657	0.563471	9.94197e-05	0.114948	7.11008e-07	6.1855	0.420411	1.32836e-06	3.15968	0.276012	9.65146e-07	3.49676	0.850819	2.69286e-06	3.16502	0.563507	9.884e-05	0.114954	5.06786e-07	4.40858	0.420421	9.13104e-07	2.17188	0.276012
20240403	PF017	F02	Sm ICP ETH	Session #8	Multistatic	300	no activator	1.2 mil	1.2 mil	3.34376	340	0.114982	1.09819e-06	9.55098	0.420429	1.94474e-06	4.62561	0.516881	2.02069e-06	3.90939	0.275987	1.3599e-06	4.9274	0.850777	3.63432e-06	4.27176	0.563782	0.000191275	0.114967	1.23324e-06	10.7269	0.420405	1.87019e-06	4.44853	0.275986	1.42943e-06	5.17934	0.85081	3.87917e-06	4.55938	0.563823	0.000191423	0.114974	8.19352e-07	7.1264	0.420417	1.43896e-06	3.42271	0.275987
20240403	PF017	F03	Sm ICP ETH	Session #8	Multistatic	300	no activator	1.2 mil	1.2 mil	4.19567	600	0.114982	7.02893e-07	6.11309	0.420432	1.30586e-06	3.10599	0.516881	1.35651e-06	2.62442	0.275988	9.26077e-07	3.3555	0.850774	2.38889e-06	2.8079	0.563843	0.000152824	0.114968	7.36903e-07	6.40967	0.420409	1.34105e-06	3.18988	0.275985	9.6731e-07	3.50494	0.850808	2.53806e-06	2.98311	0.563884	0.000152862	0.114974	5.08242e-07	4.42048	0.42042	9.43862e-07	2.24504	0.275986
20240404	PF017	F08	Sm ICP ETH	Session #8	Multistatic	300	no activator	1.2 mil	1.2 mil	3.76851	180	0.114982	1.41212e-06	12.2812	0.420431	2.17829e-06	5.18108	0.516881	2.50925e-06	4.8546	0.275989	1.83914e-06	6.66383	0.850783	4.71219e-06	5.53865	0.562637	0.000295694	0.114968	1.3773e-06	11.9799	0.420411	2.54548e-06	6.05473	0.275987	1.83841e-06	6.66122	0.850805	5.0362e-06	5.91933	0.562668	0.000295714	0.114975	9.96207e-07	8.66453	0.420423	1.53162e-06	3.64305	0.275987
20240404	PF017	F09	Sm ICP ETH	Session #8	Multistatic	300	no activator	1.2 mil	1.2 mil	3.73746	562	0.114981	7.99931e-07	6.95706	0.420431	1.38539e-06	3.29516	0.516884	1.51786e-06	2.93657	0.275987	9.88342e-07	3.58112	0.850774	2.85843e-06	3.3598	0.563771	0.000203778	0.114966	7.91906e-07	6.88817	0.42041	1.48006e-06	3.52052	0.275987	1.058e-06	3.83351	0.850809	2.75091e-06	3.23329	0.56381	0.000204155	0.114974	5.78941e-07	5.03542	0.420421	1.02924e-06	2.44811	0.275987
20240404	PF017	F10	Sm ICP ETH	Session #8	Multistatic	300	no activator	1.2 mil	1.2 mil	3.63841	160	0.114982	1.52101e-06	13.2282	0.42043	2.66702e-06	6.34355	0.516878	2.70199e-06	5.22752	0.275988	2.05237e-06	7.43647	0.850781	5.43658e-06	6.39011	0.563044	0.00029099	0.114969	1.46083e-06	12.7063	0.420413	2.91606e-06	6.93619	0.275984	2.06817e-06	7.49378	0.850814	5.40501e-06	6.35275	0.563079	0.000292057	0.114976	1.07608e-06	9.35922	0.420421	1.90086e-06	4.52133	0.275985
20240404	PF017	F11	Sm ICP ETH	Session #8	Multistatic	300	no activator	1.2 mil	1.2 mil	3.06363	220	0.114983	1.46475e-06	12.7389	0.420435	2.47765e-06	5.89306	0.516882	2.69623e-06	5.21632	0.275986	1.70096e-06	6.16319	0.850781	4.64703e-06	5.46207	0.56363	0.000221564	0.114967	1.61546e-06	14.0515	0.420406	2.4051e-06	5.72089	0.275984	1.76787e-06	6.40568	0.850812	4.59251e-06	5.39779	0.563674	0.000221803	0.114975	1.09272e-06	9.504	0.420421	1.82496e-06	4.3408	0.275986
20240405	PF017	F12	Sm ICP ETH	Session #8	Multistatic	300	no activator	1.2 mil	1.2 mil	3.52193	240	0.114983	1.21236e-06	10.5439	0.420432	2.23607e-06	5.3185	0.516882	2.4756e-06	4.78949	0.275988	1.57513e-06	5.70724	0.850779	3.80591e-06	4.47344	0.563703	0.000176399	0.114967	1.27117e-06	11.0568	0.42041	2.20106e-06	5.2355	0.275986	1.59403e-06	5.77576	0.85081	4.14465e-06	4.87141	0.563742	0.000177692	0.114976	8.89688e-07	7.73806	0.420421	1.61515e-06	3.84174	0.275987
20240405	PF017	F13	SRM 3147a	Session #8	Multistatic	300	no activator	1.2 mil	1.2 mil	3.66941	240	0.114981	1.26905e-06	11.0371	0.420436	2.15146e-06	5.11722	0.516885	2.47456e-06	4.78745	0.275991	1.48894e-06	5.39491	0.850784	4.65976e-06	5.47702	0.563184	0.000251432	0.114966	1.20869e-06	10.5135	0.420413	2.17786e-06	5.18028	0.275987	1.62543e-06	5.88953	0.850824	4.60121e-06	5.40795	0.563224	0.000252854	0.114973	8.70685e-07	7.57293	0.420424	1.63064e-06	3.87855	0.275989
20240405	PF017	F14	SRM 3147a	Session #8	Multistatic	300	no activator	1.2 mil	1.2 mil	3.80972	500	0.114977	8.15925e-07	7.09641	0.420433	1.43564e-06	3.41468	0.516892	1.57506e-06	3.04718	0.275992	1.04931e-06	3.80197	0.850789	2.85642e-06	3.35738	0.564863	0.000186043	0.114965	7.81534e-07	6.79802	0.420412	1.48639e-06	3.53556	0.275988	1.03683e-06	3.75678	0.850819	2.87757e-06	3.38212	0.564902	0.000186215	0.114971	5.80614e-07	5.0501	0.420423	1.02523e-06	2.43858	0.27599
20240406	PF017	F15	SRM 3147a	Session #8	Multistatic	300	no activator	1.2 mil	1.2 mil	3.9962	240	0.114977	1.15189e-06	10.0184	0.420433	2.03229e-06	4.83379	0.516887	2.38094e-06	4.6063	0.27599	1.48204e-06	5.36991	0.850784	3.96171e-06	4.65654	0.564846	7.54456e-05	0.114962	1.29778e-06	11.2887	0.420411	2.14603e-06	5.10461	0.275987	1.45475e-06	5.27107	0.850822	4.07277e-06	4.78686	0.564885	7.58477e-05	0.11497	9.38955e-07	8.16699	0.420423	1.51442e-06	3.60214	0.275989
20240406	PF017	F16	SRM 3147a	Session #8	Multistatic	300	no activator	1.2 mil	1.2 mil	3.73983	320	0.114979	1.1234e-06	9.77052	0.420435	2.02786e-06	4.82325	0.516892	1.96844e-06	3.80821	0.275992	1.45469e-06	5.27075	0.85079	3.6012e-06	4.23277	0.564146	0.000167112	0.114966	1.08222e-06	9.41337	0.420412	1.74111e-06	4.14143	0.27599	1.36768e-06	4.95552	0.85082	3.58305e-06	4.21129	0.564186	0.000167379	0.114972	8.13674e-07	7.07714	0.420424	1.40999e-06	3.35374	0.275991
20240408	PF018	F14	SRM 3147a	Session #8	Multistatic	300	no activator	1.2 mil	1.2 mil	3.18144	340	0.114981	1.10096e-06	9.57516	0.420436	2.06696e-06	4.91623	0.516895	2.2342e-06	4.32236	0.275994	1.43907e-06	5.21413	0.850789	4.03169e-06	4.73877	0.562985	0.000273187	0.114967	1.09675e-06	9.53969	0.420413	1.92666e-06	4.58278	0.275991	1.44451e-06	5.23389	0.850823	3.72676e-06	4.38018	0.563025	0.000273727	0.114974	7.89141e-07	6.86366	0.420425	1.33968e-06	3.18649	0.275992
20240408	PF018	F15	SRM 3147a	Session #8	Multistatic	300	no activator	1.2 mil	1.2 mil	3.51868	429	0.114978	9.28256e-07	8.07332	0.420436	1.70605e-06	4.05782	0.516894	1.86107e-06	3.60049	0.275991	1.19802e-06	4.34079	0.850779	3.15566e-06	3.70915	0.563692	0.000275628	0.114965	9.09305e-07	7.90944	0.42041	1.65874e-06	3.94552	0.275989	1.17649e-06	4.2628	0.850817	3.19986e-06	3.76093	0.563732	0.000276099	0.114971	6.82914e-07	5.93985	0.420424	1.23602e-06	2.93993	0.27599
20240410	PF018	F16	SRM 3147a	Session #8	Multistatic	300	no activator	1.2 mil	1.2 mil	3.22673	720	0.114977	7.94061e-07	6.90626	0.420436	1.35752e-06	3.22883	0.516891	1.49484e-06	2.89198	0.275992	9.97212e-07	3.6132	0.850782	2.60869e-06	3.06622	0.563522	0.000213382	0.114965	7.75196e-07	6.7429	0.420413	1.32272e-06	3.14624	0.275989	9.4677e-07	3.43047	0.850817	2.70635e-06	3.18088	0.563561	0.000213659	0.114971	5.65613e-07	4.91961	0.420424	8.85729e-07	2.10675	0.27599
20240416	PF019	F02	SRM 3147a	Session #8	Multistatic	300	no activator	1.2 mil	1.2 mil	3.42781	360	0.114978	1.02981e-06	8.95658	0.420438	1.67721e-06	3.98919	0.516894	1.90011e-06	3.67601	0.275992	1.37503e-06	4.98212	0.850786	3.53906e-06	4.15975	0.563025	0.000249099	0.114963	1.13341e-06	9.85894	0.42041	1.82983e-06	4.3525	0.275989	1.23332e-06	4.46872	0.850825	3.48376e-06	4.09457	0.563063	0.000249005	0.11497	7.94992e-07	6.91476	0.420424	1.28749e-06	3.06236	0.27599
20240416	PF019	F03	SRM 3147a	Session #8	Multistatic	300	no activator	1.2 mil	1.2 mil	3.68034	480	0.114978	9.07382e-07	7.89179	0.420437	1.52679e-06	3.63144	0.516893	1.58843e-06	3.07304	0.275993	1.08506e-06	3.93148	0.850792	3.07565e-06	3.61504	0.563908	0.000174608	0.114964	9.16956e-07	7.97606	0.420413	1.51868e-06	3.61236	0.27599	1.13517e-06	4.11307	0.850824	3.25136e-06	3.82142	0.56395	0.000174602	0.114971	6.43639e-07	5.59827	0.420425	1.0613e-06	2.52436	0.275992
20240417	PF019	F04	SRM 3147a	Session #8	Multistatic	300	no activator	1.2 mil	1.2 mil	3.68703	660	0.114977	7.59813e-07	6.60839	0.420435	1.31594e-06	3.12996	0.51689	1.43378e-06	2.77386	0.275989	9.2675e-07	3.35792	0.850789	2.55331e-06	3.00111	0.563621	0.000164854	0.114963	7.78823e-07	6.77458	0.420411	1.30864e-06	3.11276	0.275987	9.36285e-07	3.3925	0.85082	2.56437e-06	3.014	0.563659	0.000164691	0.11497	5.87542e-07	5.1104	0.420423	9.17189e-07	2.18159	0.275989
20240418	PF019	F05	SRM 3147a	Session #8	Multistatic	300	no activator	1.2 mil	1.2 mil	3.44693	360	0.114977	1.10998e-06	9.65391	0.420436	1.8899e-06	4.49508	0.516892	2.1149e-06	4.09156	0.275992	1.37254e-06	4.97313	0.850785	3.75346e-06	4.41177	0.563543	0.000214949	0.114964	1.11301e-06	9.68142	0.420411	1.83483e-06	4.36437	0.275988	1.3905e-06	5.03827	0.850818	3.6453e-06	4.28447	0.563576	0.000215838	0.114971	8.60995e-07	7.48883	0.420424	1.38055e-06	3.28371	0.275989
20240419	PF019	F06	SRM 3147a	Session #8	Multistatic	300	no activator	1.2 mil	1.2 mil	3.05642	340	0.114979	1.20338e-06	10.4661	0.420436	2.26759e-06	5.39343	0.516885	2.06835e-06	4.00156	0.275993	1.44419e-06	5.23271	0.850794	4.2231e-06	4.96372	0.561161	0.000344242	0.114967	1.18483e-06	10.3059	0.420412	2.14947e-06	5.11276	0.275985	1.40289e-06	5.08322	0.850818	3.83926e-06	4.51243	0.56119	0.000344305	0.114973	8.8892e-07	7.73156	0.420425	1.56395e-06	3.71993	0.275989
20240420	PF019	F07	SRM 3147a	Session #8	Multistatic	300	no activator	1.2 mil	1.2 mil	3.29031	600	0.114978	8.83158e-07	7.68107	0.420436	1.35412e-06	3.22075	0.516889	1.42576e-06	2.75835	0.275991	1.0608e-06	3.84358	0.85079	2.8993e-06	3.40777	0.563866	0.000117198	0.114964	8.67357e-07	7.54457	0.420413	1.47697e-06	3.51316	0.275988	1.01729e-06	3.68599	0.850822	2.68525e-06	3.15607	0.563904	0.000117265	0.114971	6.4315e-07	5.59402	0.420424	9.65574e-07	2.29667	0.27599
20240421	PF019	F08	SRM 3147a	Session #8	Multistatic	300	no activator	1.2 mil	1.2 mil	3.49406	360	0.114978	1.05437e-06	9.17018	0.420438	1.65755e-06	3.94245	0.516889	1.83754e-06	3.55499	0.275993	1.28077e-06	4.6406	0.850789	3.41907e-06	4.01871	0.562587	0.000329766	0.114965	1.06545e-06	9.26759	0.420414	1.7771e-06	4.22704	0.275988	1.37023e-06	4.9648	0.850815	3.43955e-06	4.04265	0.562622	0.000330178	0.114972	8.06717e-07	7.01665	0.420426	1.29441e-06	3.0788	0.275991
20240408	PF018	F01	UB-N	Session #8	Multistatic	220	no activator	1.2 mil	1.2 mil	3.86361	200	0.11498	1.30289e-06	11.3315	0.420438	2.31805e-06	5.51341	0.516895	2.44581e-06	4.73174	0.275993	1.65067e-06	5.98086	0.850785	4.39072e-06	5.16079	0.564088	0.000213206	0.114965	1.40763e-06	12.2439	0.420412	2.48197e-06	5.90366	0.275992	1.66957e-06	6.04934	0.850819	4.78736e-06	5.62676	0.564128	0.000211818	0.114973	9.85025e-07	8.56746	0.420425	1.63976e-06	3.90024	0.275992
20240409	PF018	F02	BE-N #2a	Session #8	Multistatic	300	no activator	1.2 mil	1.2 mil	3.44203	280	0.114977	1.15717e-06	10.0644	0.420431	1.94876e-06	4.63514	0.516887	2.2584e-06	4.36923	0.275987	1.50004e-06	5.43516	0.85079	3.86704e-06	4.54523	0.563538	0.000228423	0.114966	1.18058e-06	10.269	0.42041	2.2044e-06	5.24344	0.275988	1.43225e-06	5.18954	0.850813	3.92858e-06	4.61744	0.563566	0.000228196	0.114971	9.14357e-07	7.9529	0.42042	1.53638e-06	3.6544	0.275988
20240409	PF018	F03	BE-N #2b	Session #8	Multistatic	300	no activator	1.2 mil	1.2 mil	3.58005	440	0.114977	9.2316e-07	8.02905	0.420435	1.51058e-06	3.5929	0.516889	1.67907e-06	3.24842	0.275991	1.23105e-06	4.46047	0.85078	3.05555e-06	3.59146	0.563896	0.000197424	0.114965	8.68981e-07	7.55864	0.420412	1.5662e-06	3.72538	0.275991	1.2076e-06	4.37549	0.850814	3.01479e-06	3.54342	0.563931	0.000197176	0.114971	6.62228e-07	5.75994	0.420424	1.02704e-06	2.44288	0.275991
20240410	PF018	F08	BHVO-2 #2a	Session #8	Multistatic	300	no activator	1.2 mil	1.2 mil	3.44276	353	0.11498	1.09896e-06	9.5578	0.420437	2.04574e-06	4.86575	0.516888	2.1863e-06	4.22973	0.275991	1.43121e-06	5.18569	0.850791	3.69327e-06	4.34099	0.562934	0.000202851	0.114968	1.2024e-06	10.4586	0.420414	2.21032e-06	5.25748	0.275988	1.47229e-06	5.33461	0.850819	3.73782e-06	4.3932	0.562957	0.000206969	0.114974	8.36627e-07	7.27668	0.420425	1.49142e-06	3.54741	0.27599
20240417	PF019	F01	BHVO-2 #2b	Session #8	Multistatic	300	no activator	1.2 mil	1.2 mil	2.32584	140	0.114981	2.05398e-06	17.8636	0.420437	3.58032e-06	8.5157	0.516896	3.92765e-06	7.59853	0.27599	2.54716e-06	9.22918	0.850776	8.14313e-06	9.57142	0.563702	0.000219026	0.114964	2.154e-06	18.7362	0.420413	3.77236e-06	8.97299	0.275992	2.71094e-06	9.82256	0.850819	7.02733e-06	8.25949	0.563741	0.000218045	0.114972	1.63035e-06	14.1804	0.420425	2.2712e-06	5.40215	0.27599
20240409	PF018	F10	Sm ICP ETH processed #1	Session #8	Multistatic	300	no activator	1.2 mil	1.2 mil	3.16126	230	0.114982	1.40349e-06	12.2062	0.420432	2.46527e-06	5.86365	0.516886	2.53521e-06	4.90479	0.275987	1.71834e-06	6.22616	0.850775	4.6408e-06	5.4548	0.564049	0.000138282	0.114968	1.38072e-06	12.0096	0.420408	2.52014e-06	5.99451	0.275986	1.77769e-06	6.44122	0.850809	4.7478e-06	5.58034	0.564089	0.00013773	0.114975	9.80767e-07	8.53029	0.420419	1.83608e-06	4.36725	0.275986
20240410	PF018	F11	Sm ICP ETH processed #2	Session #8	Multistatic	300	no activator	1.2 mil	1.2 mil	3.84539	370	0.114982	9.99183e-07	8.6899	0.420435	1.63934e-06	3.89916	0.516886	1.83787e-06	3.55565	0.275991	1.26689e-06	4.59032	0.850779	3.25938e-06	3.83106	0.564076	0.000148312	0.114968	9.85219e-07	8.56951	0.420415	1.68257e-06	4.00216	0.275988	1.3278e-06	4.81107	0.850809	3.23886e-06	3.8068	0.564116	0.000147932	0.114975	7.10994e-07	6.1839	0.420424	1.18017e-06	2.80709	0.275989
20240528	PF020	F01	Sm ICP LMV	Session #9	Multistatic	300	no activator	1.2 mil	1.2 mil	4.02406	460	0.114978	8.68175e-07	7.5508	0.420433	1.50792e-06	3.58659	0.51689	1.60369e-06	3.10258	0.27599	1.10896e-06	4.01811	0.850793	2.87655e-06	3.38103	0.56327	0.000201527	0.114961	7.85358e-07	6.83154	0.420407	1.46804e-06	3.49195	0.275987	1.12304e-06	4.06917	0.850821	2.8603e-06	3.36181	0.563313	0.000201926	0.114969	5.90563e-07	5.13671	0.420419	1.03543e-06	2.46286	0.275988
20240528	PF020	F02	Sm ICP LMV	Session #9	Multistatic	300	no activator	1.2 mil	1.2 mil	3.53958	180	0.114978	1.48214e-06	12.8906	0.420431	2.56651e-06	6.10446	0.516893	2.29496e-06	4.43991	0.275989	1.75861e-06	6.37202	0.850779	5.4847e-06	6.44668	0.56295	0.000212635	0.114963	1.43879e-06	12.5153	0.420407	2.3431e-06	5.5734	0.275992	2.01692e-06	7.30792	0.850816	4.62995e-06	5.44177	0.562987	0.000212412	0.114971	1.06375e-06	9.25235	0.420419	1.67433e-06	3.98253	0.275991
20240528	PF020	F03	Sm ICP LMV	Session #9	Multistatic	300	no activator	1.2 mil	1.2 mil	3.37162	700	0.114976	7.60368e-07	6.6133	0.420433	1.27597e-06	3.0349	0.516892	1.35305e-06	2.61766	0.27599	9.44479e-07	3.42216	0.850786	2.51189e-06	2.95244	0.563639	0.000148919	0.114962	7.35672e-07	6.39925	0.42041	1.35226e-06	3.21653	0.275987	9.37823e-07	3.39807	0.850816	2.47919e-06	2.9139	0.563678	0.00014886	0.114969	5.5004e-07	4.78424	0.420422	9.66171e-07	2.2981	0.275988
20240529	PF020	F04	Sm ICP LMV	Session #9	Multistatic	300	no activator	1.2 mil	1.2 mil	4.21623	800	0.114975	6.385e-07	5.55339	0.420433	1.04376e-06	2.48258	0.516892	1.09078e-06	2.11027	0.275992	8.14347e-07	2.95062	0.850786	2.18602e-06	2.56942	0.564811	0.000164282	0.114962	6.33473e-07	5.51027	0.420412	1.07855e-06	2.56547	0.275989	8.02073e-07	2.90618	0.850812	2.16324e-06	2.54256	0.564847	0.000164367	0.114969	4.58521e-07	3.98822	0.420422	7.56764e-07	1.80001	0.27599
20240603	PF021	F01	Sm ICP LMV	Session #9	Multistatic	300	no activator	1.2 mil	1.2 mil	3.95393	800	0.114975	6.64328e-07	5.77803	0.420435	1.14355e-06	2.71993	0.516892	1.19365e-06	2.30927	0.27599	8.09983e-07	2.93483	0.850789	2.16975e-06	2.55028	0.564018	0.000154794	0.114961	6.69695e-07	5.82538	0.420412	1.11126e-06	2.64326	0.275988	7.83859e-07	2.8402	0.850819	2.20559e-06	2.59231	0.564055	0.000154804	0.114968	5.05849e-07	4.3999	0.420424	7.63147e-07	1.81519	0.275989
20240603	PF021	F02	Sm ICP LMV	Session #9	Multistatic	300	no activator	1.2 mil	1.2 mil	4.27847	600	0.114978	7.22299e-07	6.28207	0.420434	1.26804e-06	3.01603	0.516887	1.40926e-06	2.72644	0.275991	8.91026e-07	3.22846	0.850786	2.48191e-06	2.9172	0.562989	0.000187136	0.114965	7.20168e-07	6.26424	0.420412	1.24469e-06	2.96064	0.27599	9.51509e-07	3.44762	0.85082	2.34434e-06	2.75539	0.563031	0.000187162	0.114972	5.24055e-07	4.55813	0.420423	9.07221e-07	2.15788	0.27599
20240608	PF021	F03	Sm ICP LMV	Session #9	Multistatic	300	no activator	1.2 mil	1.2 mil	4.53427	780	0.114976	5.95641e-07	5.18057	0.420435	1.11557e-06	2.65336	0.51689	1.07496e-06	2.07967	0.275991	7.87006e-07	2.85157	0.850796	2.05338e-06	2.41348	0.563565	0.000144305	0.114963	6.17428e-07	5.37066	0.420412	1.06362e-06	2.52994	0.275989	7.91554e-07	2.86806	0.850819	2.07037e-06	2.43338	0.563599	0.000144302	0.114969	4.55301e-07	3.96019	0.420423	7.94851e-07	1.8906	0.27599
20240609	PF021	F04	Sm ICP LMV	Session #9	Multistatic	300	no activator	1.2 mil	1.2 mil	4.56425	620	0.114977	6.86584e-07	5.9715	0.420435	1.25683e-06	2.98937	0.516892	1.24533e-06	2.40926	0.275992	8.37054e-07	3.0329	0.850796	2.4274e-06	2.8531	0.563865	0.000142705	0.114962	6.92992e-07	6.02799	0.42041	1.13073e-06	2.68959	0.275989	8.9444e-07	3.24086	0.850816	2.28283e-06	2.6831	0.563901	0.000142525	0.11497	4.91856e-07	4.27814	0.420423	8.18395e-07	1.9466	0.27599
20240610	PF021	F09	Sm ICP LMV	Session #9	Multistatic	300	no activator	1.2 mil	1.2 mil	3.66801	300	0.114978	1.09346e-06	9.51019	0.420436	1.84095e-06	4.37866	0.516894	2.19366e-06	4.24393	0.275992	1.37693e-06	4.98904	0.85079	3.79713e-06	4.46306	0.563892	0.000216547	0.114964	1.11402e-06	9.69016	0.420415	2.00893e-06	4.77843	0.27599	1.4521e-06	5.26144	0.850816	3.82248e-06	4.49272	0.563928	0.000215792	0.114971	8.50479e-07	7.39734	0.420426	1.41266e-06	3.36007	0.275991
20240529	PF020	F09	Sm ICP ETH	Session #9	Multistatic	300	no activator	1.2 mil	1.2 mil	3.05165	460	0.114982	9.79826e-07	8.52157	0.420434	1.61039e-06	3.8303	0.516882	1.90251e-06	3.68074	0.275989	1.2151e-06	4.40271	0.850777	3.33083e-06	3.91504	0.563858	0.000185247	0.114967	9.59611e-07	8.34681	0.420411	1.73881e-06	4.13598	0.275987	1.25936e-06	4.56311	0.850811	3.33057e-06	3.91458	0.5639	0.000184761	0.114975	7.22686e-07	6.28561	0.420422	1.16786e-06	2.77782	0.275988
20240529	PF020	F10	Sm ICP ETH	Session #9	Multistatic	300	no activator	1.2 mil	1.2 mil	3.56656	220	0.114982	1.30886e-06	11.3832	0.420432	2.1836e-06	5.19372	0.516882	2.35307e-06	4.55243	0.275989	1.64966e-06	5.97726	0.850777	4.98109e-06	5.85475	0.564339	0.000287597	0.114967	1.43978e-06	12.5234	0.420409	2.26452e-06	5.38646	0.275985	1.71576e-06	6.21686	0.850805	4.35863e-06	5.12295	0.564374	0.000287156	0.114974	9.94598e-07	8.65063	0.42042	1.56884e-06	3.73161	0.275986
20240530	PF020	F11	Sm ICP ETH	Session #9	Multistatic	300	no activator	1.2 mil	1.2 mil	3.26734	360	0.114981	1.05377e-06	9.16473	0.420428	1.82519e-06	4.34125	0.516882	2.07583e-06	4.01607	0.275986	1.38529e-06	5.01941	0.850774	3.64124e-06	4.27992	0.563807	0.000182728	0.11497	1.10707e-06	9.62919	0.420408	1.89901e-06	4.51708	0.275989	1.41308e-06	5.12006	0.850806	3.94374e-06	4.6353	0.56384	0.000182407	0.114975	7.8281e-07	6.8085	0.420418	1.26928e-06	3.01909	0.275987
20240531	PF020	F12	Sm ICP ETH	Session #9	Multistatic	300	no activator	1.2 mil	1.2 mil	3.70232	480	0.114981	8.91878e-07	7.75677	0.420431	1.47935e-06	3.51866	0.516883	1.73091e-06	3.34874	0.275985	1.08067e-06	3.91568	0.850772	2.82764e-06	3.32362	0.564012	0.000226289	0.114967	9.22769e-07	8.02639	0.420408	1.45545e-06	3.462	0.275987	1.14893e-06	4.163	0.850806	3.1112e-06	3.65677	0.564048	0.000226417	0.114974	6.86251e-07	5.96876	0.420419	1.06621e-06	2.53606	0.275986
20240601	PF020	F13	Sm ICP ETH	Session #9	Multistatic	300	no activator	1.2 mil	1.2 mil	3.586	300	0.11498	1.20385e-06	10.47	0.420429	2.00107e-06	4.7596	0.516881	2.12425e-06	4.10975	0.275986	1.37979e-06	4.9995	0.85077	3.68356e-06	4.32967	0.563632	0.000298354	0.114967	1.18094e-06	10.272	0.42041	1.92608e-06	4.58142	0.275985	1.25075e-06	4.53195	0.850799	3.93987e-06	4.63079	0.56366	0.00029817	0.114974	8.97543e-07	7.80652	0.420419	1.36267e-06	3.24123	0.275985
20240604	PF021	F11	Sm ICP ETH	Session #9	Multistatic	300	no activator	1.2 mil	1.2 mil	3.84571	500	0.114981	8.10312e-07	7.04734	0.420433	1.40874e-06	3.3507	0.516881	1.68317e-06	3.2564	0.275986	1.04832e-06	3.79846	0.850781	2.85077e-06	3.35076	0.563554	0.000203223	0.114968	8.95581e-07	7.78982	0.420406	1.65142e-06	3.92817	0.275983	1.06156e-06	3.84646	0.850805	3.02257e-06	3.5526	0.563591	0.00020358	0.114975	6.04305e-07	5.25597	0.420419	1.12985e-06	2.68744	0.275985
20240606	PF021	F12	Sm ICP ETH	Session #9	Multistatic	300	no activator	1.2 mil	1.2 mil	3.547	640	0.11498	7.81465e-07	6.79653	0.420433	1.31452e-06	3.12659	0.516884	1.42035e-06	2.74792	0.275989	9.68557e-07	3.5094	0.850783	2.58055e-06	3.03315	0.564256	0.00016649	0.114966	7.61861e-07	6.62681	0.420408	1.31613e-06	3.1306	0.275986	1.04002e-06	3.76837	0.850808	2.56493e-06	3.0147	0.564292	0.000166403	0.114973	5.42522e-07	4.71868	0.420421	9.01956e-07	2.14536	0.275988
20240614	PF022	F17	Sm ICP ETH	Session #9	Multistatic	300	no activator	1.2 mil	1.2 mil	3.72095	540	0.114981	7.95906e-07	6.92207	0.420434	1.42957e-06	3.40022	0.516885	1.53735e-06	2.97426	0.275991	1.02151e-06	3.70124	0.850778	2.7748e-06	3.26149	0.564857	0.00018493	0.114967	7.69254e-07	6.69107	0.420412	1.36867e-06	3.25555	0.275989	1.02371e-06	3.70924	0.850803	2.69658e-06	3.16945	0.564894	0.00018496	0.114974	5.70008e-07	4.95772	0.420423	9.73251e-07	2.31493	0.27599
20240530	PF020	F14	BHVO-2 #3	Session #9	Multistatic	360	no activator	1.2 mil	1.2 mil	4.05949	360	0.11498	9.5457e-07	8.30209	0.420432	1.65661e-06	3.94025	0.516892	1.85301e-06	3.58491	0.275987	1.19649e-06	4.33532	0.850785	3.35504e-06	3.94346	0.563803	0.000166688	0.114964	9.29973e-07	8.08928	0.420407	1.58523e-06	3.7707	0.275988	1.11522e-06	4.04084	0.850821	2.8532e-06	3.35347	0.563844	0.00016676	0.114972	6.93945e-07	6.03579	0.42042	1.10246e-06	2.62229	0.275987
20240601	PF020	F16	BE-N #2c	Session #9	Multistatic	300	no activator	1.2 mil	1.2 mil	3.22632	220	0.114977	1.41393e-06	12.2975	0.420436	2.49565e-06	5.93586	0.516892	2.68556e-06	5.1956	0.275988	1.88131e-06	6.81662	0.850789	4.44229e-06	5.22138	0.563536	0.000313427	0.114963	1.60271e-06	13.9411	0.42041	2.49117e-06	5.92559	0.275985	1.92254e-06	6.96612	0.850811	4.95646e-06	5.82557	0.563566	0.000314284	0.11497	1.13139e-06	9.84071	0.420423	1.70556e-06	4.05678	0.275986
20240606	PF021	F16	BHVO-2 #2c	Session #9	Multistatic	300	no activator	1.2 mil	1.2 mil	4.62711	300	0.114978	9.46271e-07	8.22998	0.420435	1.85665e-06	4.41603	0.51689	1.8096e-06	3.50094	0.275988	1.15297e-06	4.17759	0.850782	3.34057e-06	3.92647	0.565091	0.000162627	0.114965	9.34379e-07	8.1275	0.420407	1.60224e-06	3.81116	0.275989	1.27209e-06	4.60922	0.850819	3.44555e-06	4.04968	0.565134	0.000162581	0.114972	6.78137e-07	5.89828	0.420421	1.18666e-06	2.82256	0.275989
20240607	PF021	F17	BE-N #2d	Session #9	Multistatic	300	no activator	1.2 mil	1.2 mil	3.67754	500	0.114978	8.17158e-07	7.10709	0.420434	1.47434e-06	3.50671	0.51689	1.54776e-06	2.99437	0.27599	1.08781e-06	3.94149	0.850785	2.93668e-06	3.45173	0.564023	0.000152202	0.114964	8.7485e-07	7.60978	0.42041	1.49515e-06	3.55641	0.275989	1.06761e-06	3.86829	0.850816	2.98858e-06	3.51261	0.564061	0.000152292	0.114971	5.97488e-07	5.19687	0.420422	1.03829e-06	2.46963	0.27599
[truncated: 8 more columns]

## Sheet: 3. Static 152Sm-148Sm
Static method - corrected for mass fractionation with 152Sm/148Sm=2.37689
Date	Barrel	Filament	Sample	Session	Method	Mass (ng)	Loading	EVAP	IONI	I152Sm (V)	n	144Sm/148Sm	2 SE	2 RSE (ppm)	147Sm/148Sm	2 SE	2 RSE (ppm)	149Sm/148Sm	2 SE	2 RSE (ppm)	150Sm/148Sm	2 SE	2 RSE (ppm)	154Sm/148Sm	2 SE	2 RSE (ppm)	152Sm/148Sm	2 SE	146Nd/152Sm	156Gd/152Sm		Efficiency (%)
20220504	PF001	F02	Sm ICP ETH	Session #1	Static	200	no activator	1.6 mil	1.6 mil	3.46329	520	0.273682	2.61694e-06	9.56198	1.33415	5.84607e-06	4.38185	1.22913	4.16993e-06	3.39259	0.656212	2.65503e-06	4.046	2.02149	7.18276e-06	3.55321	2.3701	0.000599047	4.02287e-06	4.27202e-06		0.00235533
20220504	PF001	F03	Sm ICP ETH	Session #1	Static	200	no activator	1.6 mil	1.6 mil	2.8319	1200	0.27368	2.14263e-06	7.82894	1.33414	4.66846e-06	3.49921	1.22913	3.34207e-06	2.71906	0.656217	2.14511e-06	3.26891	2.02154	6.08167e-06	3.00843	2.36888	0.000429976	8.45564e-06	9.15854e-06		0.00549191
20220505	PF001	F04	Sm ICP ETH	Session #1	Static	200	no activator	1.6 mil	1.6 mil	2.76789	1440	0.273682	1.79087e-06	6.5436	1.33415	4.22904e-06	3.16984	1.22912	2.97398e-06	2.41959	0.656213	1.83048e-06	2.78947	2.02154	5.42472e-06	2.68346	2.36695	0.000341073	1.17772e-05	4.32437e-06		0.00662923
20220505	PF001	F08	Sm ICP ETH	Session #1	Static	200	no activator	1.6 mil	1.6 mil	2.62312	720	0.273682	2.51684e-06	9.1962	1.33415	5.74838e-06	4.30866	1.22912	4.34397e-06	3.5342	0.656216	2.77993e-06	4.2363	2.02156	7.51277e-06	3.71632	2.3707	0.000690178	5.14821e-06	1.31281e-05		0.0032572
20220505	PF001	F09	Sm ICP ETH	Session #1	Static	200	H3PO4	1.6 mil	1.6 mil	3.68208	660	0.273688	2.08828e-06	7.63017	1.33415	5.19368e-06	3.89287	1.22912	3.56064e-06	2.89691	0.656212	2.2808e-06	3.47571	2.02152	6.81663e-06	3.37202	2.36816	0.000252651	5.71418e-06	2.80459e-06		0.0029862
20220507	PF002	F09	Sm ICP ETH	Session #1	Static	200	no activator	1.6 mil	1.6 mil	2.87058	760	0.273676	2.29373e-06	8.38119	1.33414	5.55328e-06	4.16243	1.22913	4.03385e-06	3.28188	0.656221	2.38035e-06	3.62736	2.02156	6.80815e-06	3.36777	2.3674	0.000573627	8.29939e-06	7.02981e-06		0.00345477
20220507	PF002	F10	Sm ICP ETH	Session #1	Static	200	no activator	1.6 mil	1.6 mil	6.31299	440	0.27368	1.85212e-06	6.76747	1.33414	4.93798e-06	3.70124	1.22913	3.41081e-06	2.77498	0.656216	2.24719e-06	3.42447	2.02157	6.23913e-06	3.08628	2.36697	0.000601133	5.00025e-06	3.63068e-06		0.00295407
20220508	PF002	F11	Sm ICP ETH	Session #1	Static	200	no activator	1.6 mil	1.6 mil	6.1564	600	0.273684	1.74362e-06	6.37093	1.33415	4.23787e-06	3.17645	1.22911	2.80666e-06	2.28348	0.656211	1.86096e-06	2.83592	2.02151	5.5194e-06	2.73034	2.36825	0.000556527	2.94182e-06	2.82843e-06		0.00271666
20220508	PF002	F12	Sm ICP ETH	Session #1	Static	200	no activator	1.6 mil	1.6 mil	8.51313	320	0.27368	1.98588e-06	7.25621	1.33415	4.93218e-06	3.69688	1.22912	3.70244e-06	3.01228	0.656215	2.14276e-06	3.26533	2.02153	5.94531e-06	2.941	2.36971	0.000662857	3.71658e-06	5.44301e-06		0.00143015
20220508	PF002	F14	Sm ICP ETH	Session #1	Static	200	no activator	1.6 mil	1.6 mil	7.36362	500	0.273684	1.61453e-06	5.89926	1.33415	4.0948e-06	3.06923	1.22911	3.00684e-06	2.44634	0.656212	1.79103e-06	2.72934	2.02149	5.28569e-06	2.61475	2.36904	0.00054602	3.31408e-06	3.83383e-06		0.00255188
20220509	PF002	F16	Sm ICP ETH	Session #1	Static	200	H3PO4	1.6 mil	1.6 mil	8.34001	360	0.273675	1.8753e-06	6.85229	1.33414	4.97944e-06	3.73231	1.22912	3.51057e-06	2.85616	0.656213	1.94161e-06	2.95881	2.02147	5.86742e-06	2.90255	2.3665	0.0010773	2.81129e-06	4.01606e-06		0.0018993
20220908	PF004	F01	Sm ICP ETH	Session #3	Static	200	H3PO4	1.6 mil	1.6 mil	2.46665	900	0.273679	2.68349e-06	9.80526	1.33414	5.97878e-06	4.48136	1.22913	4.09442e-06	3.33116	0.656222	2.6307e-06	4.00886	2.02154	7.33478e-06	3.6283	2.36254	0.000736542	4.83448e-06	6.05881e-06		0.00409584
20220909	PF004	F02	Sm ICP ETH	Session #3	Static	300	H3PO4	1.6 mil	1.6 mil	6.59353	780	0.273676	1.44678e-06	5.28648	1.33415	3.5704e-06	2.67617	1.22912	2.57799e-06	2.09742	0.65622	1.57056e-06	2.39334	2.02153	4.73873e-06	2.34413	2.36203	0.000699855	5.01766e-06	3.06474e-06		0.00273269
20220909	PF004	F09	Sm ICP ETH	Session #3	Static	300	H3PO4	1.6 mil	1.6 mil	9.9436	560	0.27368	1.46794e-06	5.36371	1.33415	3.70476e-06	2.77687	1.22912	2.77361e-06	2.25659	0.656212	1.52214e-06	2.31959	2.02147	4.64185e-06	2.29628	2.36952	0.00121589	3.26712e-06	3.18755e-06		0.001686
20220909	PF004	F10	Sm ICP ETH	Session #3	Static	300	H3PO4	1.6 mil	1.6 mil	6.6924	900	0.273679	1.41603e-06	5.17406	1.33415	3.2448e-06	2.43212	1.22911	2.32912e-06	1.89496	0.656211	1.45039e-06	2.21025	2.02147	4.46405e-06	2.20832	2.36866	0.000898472	3.31841e-06	2.43133e-06		0.0028512
20220910	PF004	F11	Sm ICP ETH	Session #3	Static	300	no activator	1.6 mil	1.6 mil	6.22798	840	0.273683	1.45591e-06	5.31971	1.33415	3.55288e-06	2.66304	1.22911	2.77569e-06	2.2583	0.656214	1.57332e-06	2.39757	2.02152	4.98318e-06	2.46506	2.36795	0.000440248	4.50517e-06	3.86009e-06		0.00264256
20220911	PF004	F12	Sm ICP ETH	Session #3	Static	300	no activator	1.6 mil	1.6 mil	7.56697	600	0.27368	1.45411e-06	5.31317	1.33414	3.84157e-06	2.87943	1.22912	2.842e-06	2.31223	0.656215	1.72078e-06	2.62228	2.02154	5.02225e-06	2.48437	2.36936	0.000532801	3.30158e-06	8.1344e-06		0.00181247
20220913	PF005	F01	Sm ICP ETH	Session #3	Static	300	no activator	1.6 mil	1.6 mil	5.50988	900	0.273686	1.41663e-06	5.17612	1.33416	3.62258e-06	2.71526	1.22912	2.53149e-06	2.0596	0.656214	1.5906e-06	2.42391	2.02153	4.54147e-06	2.24656	2.36697	0.000334144	3.40417e-06	2.85409e-06		0.00273056
20230130	PF008	F15	Sm ICP ETH	Session #4	Static	300	no activator	1.0 mil	1.0 mil	4.23176	660	0.27369	2.05209e-06	7.49786	1.33415	4.64675e-06	3.48291	1.2291	3.5697e-06	2.90433	0.656209	2.21117e-06	3.36961	2.02147	6.39538e-06	3.16373	2.36831	0.000250527	1.8129e-06	1.79683e-06		0.00209114
20230131	PF008	F03	Sm ICP ETH	Session #4	Static	300	no activator	1.6 mil	1.0 mil	5.41902	800	0.273686	1.57863e-06	5.76802	1.33416	3.89321e-06	2.9181	1.22909	2.83205e-06	2.30418	0.656209	1.70286e-06	2.595	2.02146	4.86721e-06	2.40777	2.36583	0.000275679	2.00582e-06	1.71177e-06		0.00253435
20230205	PF009	F01	Sm ICP ETH	Session #4	Static	300	no activator	1.0 mil	1.0 mil	4.14102	700	0.273692	1.9953e-06	7.29029	1.33416	4.91063e-06	3.68069	1.2291	3.36467e-06	2.73752	0.656206	2.10783e-06	3.21214	2.02146	6.27535e-06	3.10436	2.36973	0.000471071	1.93836e-06	2.71704e-06		0.0022008
20230206	PF009	F02	Sm ICP ETH	Session #4	Static	300	no activator	1.0 mil	1.0 mil	6.75696	1100	0.273689	1.22111e-06	4.46167	1.33416	2.871e-06	2.15192	1.22909	2.12349e-06	1.72768	0.65621	1.28798e-06	1.96275	2.02147	3.88315e-06	1.92095	2.36578	0.000329284	1.96671e-06	1.28764e-06		0.00355404
20230207	PF009	F03	Sm ICP ETH	Session #4	Static	300	no activator	1.0 mil	1.0 mil	3.9399	240	0.273679	3.64082e-06	13.3032	1.33416	8.54394e-06	6.40401	1.22911	5.49116e-06	4.46759	0.656223	4.07097e-06	6.20363	2.0215	1.05764e-05	5.23198	2.37332	0.000921807	4.41711e-06	1.8842e-06		0.000734691
20230207	PF009	F08	Sm ICP ETH	Session #4	Static	300	no activator	1.0 mil	1.0 mil	6.06165	400	0.273682	2.2507e-06	8.22379	1.33415	5.55237e-06	4.16172	1.22912	3.89118e-06	3.16583	0.656219	2.38162e-06	3.62931	2.02155	7.05516e-06	3.48997	2.36702	0.000913468	2.80494e-06	1.82276e-06		0.001246
20230207	PF009	F09	Sm ICP ETH	Session #4	Static	300	no activator	1.0 mil	1.0 mil	6.51853	900	0.273686	1.39191e-06	5.08578	1.33416	3.46724e-06	2.59882	1.2291	2.34546e-06	1.90827	0.656215	1.53219e-06	2.33489	2.02148	4.31296e-06	2.13356	2.36888	0.000450609	2.17939e-06	1.85526e-06		0.00286645
20230208	PF009	F10	Sm ICP ETH	Session #4	Static	300	no activator	1.0 mil	1.0 mil	4.86254	500	0.27368	2.00742e-06	7.33492	1.33415	5.16402e-06	3.87064	1.22912	3.87477e-06	3.15249	0.656221	2.25524e-06	3.43671	2.02152	6.86387e-06	3.3954	2.36951	0.000569484	3.13915e-06	3.27931e-06		0.00158081
20230208	PF009	F11	Sm ICP ETH	Session #4	Static	300	no activator	1.0 mil	1.0 mil	5.07887	420	0.273687	2.31032e-06	8.4415	1.33416	5.45114e-06	4.08583	1.2291	4.16401e-06	3.38785	0.656208	2.47066e-06	3.76507	2.02144	6.66319e-06	3.29625	2.36686	0.000650775	2.04834e-06	1.28954e-06		0.0013067
20230208	PF009	F12	Sm ICP ETH	Session #4	Static	300	no activator	1.0 mil	1.0 mil	5.02987	600	0.273682	1.9033e-06	6.95443	1.33415	4.48858e-06	3.36437	1.22911	3.47587e-06	2.82797	0.656211	1.95671e-06	2.98183	2.02145	5.78832e-06	2.86345	2.37044	0.000437512	1.83661e-06	2.09334e-06		0.00197817
20230131	PF008	F12	B6 column cut	Session #4	Static	300	no activator	1.6 mil	1.0 mil	5.42089	640	0.27369	1.69783e-06	6.20348	1.33416	4.31229e-06	3.23221	1.22908	2.96507e-06	2.41243	0.656212	1.89127e-06	2.88211	2.02147	5.25665e-06	2.60042	2.36549	0.00032818	1.73758e-06	6.14156e-05		0.00934651
20230201	PF008	F11	B5 column cut	Session #4	Static	184	no activator	1.0 mil	1.0 mil	2.10171	860	0.2737	2.7483e-06	10.0413	1.33417	6.42111e-06	4.81281	1.22906	4.69007e-06	3.81597	0.656199	2.91771e-06	4.44639	2.02144	7.81129e-06	3.86423	2.36615	0.000358231	3.46069e-06	0.000784719		0.00793916
20230201	PF008	F13	B7 column cut	Session #4	Static	300	no activator	1.6 mil	1.0 mil	4.29026	900	0.273672	1.69725e-06	6.20177	1.33414	3.99251e-06	2.99257	1.22911	2.98586e-06	2.42928	0.656218	1.83298e-06	2.79325	2.0215	5.17488e-06	2.55992	2.36561	0.000354362	2.1954e-06	5.20872e-05		0.0104022
20230202	PF008	F14	B8 column cut	Session #4	Static	106	no activator	1.0 mil	1.0 mil	1.59243	240	0.273648	6.52416e-06	23.8415	1.33412	1.1938e-05	8.9482	1.22914	9.97813e-06	8.11799	0.656226	5.76581e-06	8.78631	2.02159	1.64461e-05	8.13523	2.36915	0.000710287	5.17413e-06	0.000174066		0.00291397
20230306	PF012	F01	Sm ICP ETH	Session #5	Static	300	no activator	1.6 mil	1.6 mil	3.77788	900	0.273689	1.91377e-06	6.9925	1.33416	4.47432e-06	3.35366	1.22909	3.02988e-06	2.46514	0.656209	1.94481e-06	2.9637	2.02145	5.65808e-06	2.79903	2.36351	0.00044054	2.93138e-06	3.68963e-06		0.00284178
20230306	PF012	F02	Sm ICP ETH	Session #5	Static	300	no activator	1.6 mil	1.6 mil	2.23996	460	0.273681	5.99694e-06	21.9121	1.33415	1.13974e-05	8.54283	1.22912	8.92678e-06	7.26274	0.656214	5.79441e-06	8.83006	2.02153	1.62929e-05	8.05973	2.3751	0.000703355	8.92939e-06	1.23742e-05		0.00142763
20230307	PF012	F03	Sm ICP ETH	Session #5	Static	300	no activator	1.6 mil	1.6 mil	4.68779	800	0.273686	1.68336e-06	6.15071	1.33416	4.1196e-06	3.08778	1.2291	2.93504e-06	2.38795	0.656212	1.77419e-06	2.70368	2.02145	5.43829e-06	2.69029	2.37061	0.000592151	3.25786e-06	2.27447e-06		0.00251007
20230308	PF012	F08	Sm ICP ETH	Session #5	Static	300	no activator	1.6 mil	1.6 mil	4.54978	900	0.273683	1.67993e-06	6.13826	1.33416	4.01844e-06	3.01197	1.2291	2.70979e-06	2.20469	0.656213	1.69964e-06	2.59008	2.02147	4.87961e-06	2.41389	2.36384	0.000457936	3.86781e-06	1.84909e-06		0.00286334
20230308	PF012	F09	Sm ICP ETH	Session #5	Static	300	no activator	1.6 mil	1.6 mil	3.90996	900	0.273677	1.82904e-06	6.6832	1.33415	4.57314e-06	3.42776	1.22911	3.1301e-06	2.54664	0.656219	1.88984e-06	2.8799	2.02152	5.79621e-06	2.86725	2.37095	0.000514044	4.46104e-06	4.72774e-06		0.00286373
20230308	PF012	F10	Sm ICP ETH	Session #5	Static	300	no activator	1.6 mil	1.6 mil	6.43555	852	0.273685	1.44062e-06	5.2638	1.33416	3.39166e-06	2.54218	1.22909	2.49297e-06	2.0283	0.656213	1.49503e-06	2.27827	2.02147	4.60283e-06	2.27698	2.3628	0.000329724	3.51371e-06	2.55992e-06		0.00270916
20230309	PF012	F11	Sm ICP ETH	Session #5	Static	300	no activator	1.6 mil	1.6 mil	6.35296	900	0.273683	1.43118e-06	5.22934	1.33415	3.32051e-06	2.48885	1.22909	2.40426e-06	1.95613	0.656214	1.51687e-06	2.31155	2.02148	4.46905e-06	2.21078	2.36436	0.000275594	2.83661e-06	2.04474e-06		0.00286217
20230312	PF013	F01	Sm ICP ETH	Session #5	Static	300	no activator	1.6 mil	1.6 mil	5.74906	720	0.273686	1.74307e-06	6.36888	1.33416	4.06932e-06	3.05009	1.2291	2.7825e-06	2.26385	0.656215	1.78963e-06	2.7272	2.02148	4.97629e-06	2.46171	2.36898	0.000471971	3.94893e-06	3.1227e-06		0.00226879
20230313	PF013	F02	Sm ICP ETH	Session #5	Static	300	no activator	1.6 mil	1.6 mil	2.96058	660	0.27368	2.56926e-06	9.38783	1.33415	5.83629e-06	4.37454	1.22912	4.18259e-06	3.40291	0.656213	2.47889e-06	3.77757	2.02151	7.48389e-06	3.70212	2.36998	0.000574412	3.55003e-06	7.23012e-06		0.00209347
20230313	PF013	F03	Sm ICP ETH	Session #5	Static	300	no activator	1.6 mil	1.6 mil	4.5422	280	0.273688	3.06399e-06	11.1952	1.33415	6.96789e-06	5.2227	1.2291	5.36237e-06	4.36285	0.656209	3.05316e-06	4.65273	2.02146	8.9414e-06	4.42325	2.3676	0.000543864	2.87607e-06	3.70677e-06		0.000868732
20230315	PF013	F08	Sm ICP ETH	Session #5	Static	300	no activator	1.6 mil	1.6 mil	2.66815	900	0.27368	2.37588e-06	8.68121	1.33415	5.82529e-06	4.36631	1.22912	3.93357e-06	3.2003	0.65622	2.42336e-06	3.69291	2.02154	6.9528e-06	3.43935	2.36515	0.000567802	4.94453e-06	5.40112e-06		0.00284586
20230317	PF013	F09	Sm ICP ETH	Session #5	Static	300	no activator	1.6 mil	1.6 mil	2.13429	900	0.273681	2.54179e-06	9.28742	1.33416	5.84798e-06	4.38327	1.22909	4.29484e-06	3.49434	0.65621	2.6367e-06	4.01808	2.02144	7.39666e-06	3.65911	2.36414	0.00041648	4.25821e-06	5.43687e-06		0.00281147
20230317	PF013	F10	Sm ICP ETH	Session #5	Static	300	no activator	1.6 mil	1.6 mil	1.65854	900	0.273689	3.16087e-06	11.5491	1.33416	6.75457e-06	5.06279	1.22908	4.87977e-06	3.97026	0.656216	3.12546e-06	4.76285	2.02147	8.89567e-06	4.4006	2.36814	0.000453315	4.58235e-06	4.44286e-06		0.00280506
20230314	PF013	F16	BCR-2	Session #5	Static	180	no activator	1.6 mil	1.6 mil	2.68169	740	0.273678	2.91508e-06	10.6515	1.33416	6.81395e-06	5.10732	1.22912	4.9174e-06	4.00074	0.656207	3.15097e-06	4.80179	2.02144	9.03045e-06	4.46733	2.37126	0.000591579	0.000145428	1.44368e-05		0.00392427
20230315	PF013	F17	BHVO-2 #1	Session #5	Static	217	no activator	1.6 mil	1.6 mil	2.99868	620	0.273683	2.72991e-06	9.9747	1.33415	6.11213e-06	4.58129	1.2291	4.57695e-06	3.72381	0.656213	2.72593e-06	4.15404	2.02148	7.56154e-06	3.7406	2.36809	0.000170126	1.87189e-05	1.75979e-05		0.00269909
20230315	PF013	F18	DNC-1	Session #5	Static	220	no activator	1.6 mil	1.6 mil	3.81656	260	0.273678	3.11356e-06	11.3767	1.33416	7.46405e-06	5.59458	1.22913	5.46456e-06	4.44589	0.656223	3.46966e-06	5.28732	2.02149	1.0088e-05	4.99037	2.36142	0.000901398	3.81592e-06	1.20093e-06		0.00109947
20230316	PF013	F19	W-2a	Session #5	Static	163	no activator	1.6 mil	1.6 mil	2.16758	400	0.273687	4.03926e-06	14.7587	1.33416	8.48974e-06	6.36338	1.22912	6.47164e-06	5.26526	0.656218	3.83503e-06	5.84413	2.02153	1.12181e-05	5.54928	2.36751	0.000539555	5.21988e-06	2.49372e-06		0.00227644
20230316	PF013	F20	BIR-1 #1	Session #5	Static	373	no activator	1.6 mil	1.6 mil	6.11385	500	0.273677	1.8948e-06	6.92349	1.33415	4.56155e-06	3.41906	1.2291	3.44151e-06	2.80001	0.65622	1.98096e-06	3.01875	2.02149	6.28097e-06	3.1071	2.37023	0.000816463	5.30559e-06	5.57952e-06		0.00125815
20230317	PF013	F21	BIR-1 #2	Session #5	Static	358	no activator	1.6 mil	1.6 mil	5.77237	320	0.273681	2.48028e-06	9.06267	1.33416	5.53181e-06	4.1463	1.22909	4.20002e-06	3.41717	0.656216	2.66422e-06	4.05998	2.02145	7.96091e-06	3.93821	2.36472	0.000905214	1.59432e-06	1.12917e-06		0.000812802

## Sheet: 4. Multistatic 152Sm-148Sm
Multistatic method - corrected for mass fractionation with 152Sm/148Sm=2.37689
												L1			L1			L1			L1			L1			L1		L2			L2			L2			L2			L2		Multistatic			Multistatic			Multistatic
Date	Barrel	Filament	Sample	Session	Method	Mass (ng)	Loading	EVAP	IONI	I152Sm (V)	n	144Sm/148Sm	2 SE	2 RSE (ppm)	147Sm/148Sm	2 SE	2 RSE (ppm)	149Sm/148Sm	2 SE	2 RSE (ppm)	150Sm/148Sm	2 SE	2 RSE (ppm)	154Sm/148Sm	2 SE	2 RSE (ppm)	152Sm/148Sm	2 SE	144Sm/148Sm	2 SE	2 RSE (ppm)	147Sm/148Sm	2 SE	2 RSE (ppm)	150Sm/148Sm	2 SE	2 RSE (ppm)	154Sm/148Sm	2 SE	2 RSE (ppm)	152Sm/148Sm	2 SE	144Sm/148Sm	2 SE	2 RSE (ppm)	147Sm/148Sm	2 SE	2 RSE (ppm)	150Sm/148Sm
20230107	PF007	F01	Sm ICP ETH	Session #4	Multistatic	300	no activator	1.6 mil	1.6 mil	1.98964	460	0.273688	4.00951e-06	14.6499	1.33417	1.02983e-05	7.7189	1.22909	7.51111e-06	6.11114	0.656205	4.37938e-06	6.67381	2.02146	1.19344e-05	5.90384	2.36124	0.00080515	0.273666	4.08945e-06	14.9432	1.33411	9.88653e-06	7.4106	0.65623	4.85189e-06	7.39359	2.02155	1.34015e-05	6.62935	2.36121	0.000802395	0.273678	2.86871e-06	10.4821	1.33414	7.33649e-06	5.49905	0.656217
20230124	PF007	F02	Sm ICP ETH	Session #4	Multistatic	300	no activator	1.6 mil	1.6 mil	4.29058	380	0.273686	3.14072e-06	11.4756	1.33416	7.47185e-06	5.60041	1.22911	4.99514e-06	4.06403	0.656219	3.25371e-06	4.95827	2.0215	9.4286e-06	4.66416	2.36979	0.0011201	0.273661	3.05672e-06	11.1697	1.33409	8.18969e-06	6.13877	0.656218	4.20146e-06	6.40253	2.02162	9.43e-06	4.66457	2.36992	0.00126534	0.273674	2.34471e-06	8.56753	1.33413	6.027e-06	4.51756	0.656219
20230109	PF007	F08	Sm ICP ETH	Session #4	Multistatic	300	no activator	1.6 mil	1.0 mil	3.38276	540	0.273687	2.43762e-06	8.9066	1.33416	5.81923e-06	4.36171	1.2291	4.19795e-06	3.41546	0.65621	2.70695e-06	4.12514	2.02146	7.72568e-06	3.82183	2.36148	0.000553754	0.273666	2.56607e-06	9.37665	1.33409	5.82765e-06	4.36825	0.656223	2.85598e-06	4.35214	2.02157	7.7504e-06	3.83386	2.36141	0.000552795	0.273675	1.87847e-06	6.86386	1.33413	4.32817e-06	3.2442	0.656218
20230109	PF007	F09	Sm ICP ETH	Session #4	Multistatic	300	no activator	1.6 mil	1.0 mil	3.30041	270	0.273691	3.65043e-06	13.3378	1.33416	8.81616e-06	6.60801	1.22907	6.72798e-06	5.47403	0.656216	4.22961e-06	6.44545	2.0215	1.16443e-05	5.76023	2.36251	0.00102862	0.27366	3.71248e-06	13.566	1.33406	9.30658e-06	6.97613	0.656215	4.5616e-06	6.95138	2.02157	1.08637e-05	5.37391	2.36249	0.00102522	0.273676	2.62652e-06	9.5972	1.33411	6.49517e-06	4.86854	0.656216
20230110	PF007	F10	Sm ICP ETH	Session #4	Multistatic	300	no activator	1.6 mil	1.0 mil	2.9868	460	0.273685	3.00467e-06	10.9786	1.33415	7.24299e-06	5.4289	1.22909	5.28904e-06	4.3032	0.656214	3.25181e-06	4.9554	2.02151	9.48465e-06	4.69188	2.36264	0.000838557	0.273661	3.20116e-06	11.6975	1.33408	7.57961e-06	5.68151	0.656218	3.61039e-06	5.50181	2.02157	9.47613e-06	4.68751	2.36262	0.000838007	0.273673	2.17729e-06	7.95583	1.33412	5.20906e-06	3.9045	0.656215
20230123	PF007	F11	Sm ICP ETH	Session #4	Multistatic	300	no activator	1.0 mil	1.0 mil	4.65779	540	0.273692	2.14139e-06	7.82407	1.33416	5.33776e-06	4.00083	1.22909	3.99163e-06	3.24764	0.656211	2.36972e-06	3.61122	2.02146	7.29394e-06	3.60826	2.36813	0.000441137	0.273664	2.12776e-06	7.77508	1.33408	5.43107e-06	4.07103	0.656229	2.70415e-06	4.12074	2.02163	6.71083e-06	3.31952	2.36805	0.000435274	0.273678	1.58677e-06	5.79795	1.33412	3.69033e-06	2.76612	0.656221
20230123	PF007	F12	Sm ICP ETH	Session #4	Multistatic	300	no activator	1.0 mil	1.0 mil	4.60175	460	0.273688	2.23823e-06	8.17803	1.33416	5.60859e-06	4.20384	1.22911	3.84557e-06	3.12875	0.656218	2.52576e-06	3.84896	2.0215	7.57305e-06	3.74626	2.36856	0.00050781	0.273664	2.35896e-06	8.6199	1.33409	5.86798e-06	4.3985	0.656214	2.80291e-06	4.27133	2.02163	6.86617e-06	3.39636	2.36851	0.000504712	0.273676	1.62237e-06	5.92806	1.33412	4.00043e-06	2.99855	0.656216
20230124	PF007	F13	Sm ICP ETH	Session #4	Multistatic	300	no activator	1.0 mil	1.0 mil	5.08149	540	0.273688	1.9296e-06	7.05035	1.33417	5.22339e-06	3.91509	1.2291	3.61153e-06	2.93836	0.656209	2.28033e-06	3.47501	2.02145	6.56177e-06	3.24608	2.36114	0.000540717	0.273662	2.1562e-06	7.87907	1.33408	4.94341e-06	3.70548	0.656229	2.41056e-06	3.67335	2.02164	6.32436e-06	3.12833	2.36104	0.00054019	0.273674	1.50193e-06	5.48803	1.33413	3.76521e-06	2.82222	0.65622
20230701	PF014	F02	Sm ICP ETH	Session #6	Multistatic	300	no activator	1.2 mil	1.2 mil	2.76053	540	0.273664	2.65331e-06	9.6955	1.3341	7.06514e-06	5.29581	1.22918	5.30194e-06	4.31341	0.656216	3.23971e-06	4.93696	2.02153	8.51498e-06	4.21214	2.36709	0.00036241	0.273662	2.95294e-06	10.7904	1.33417	6.88131e-06	5.15773	0.656215	3.09885e-06	4.7223	2.02157	9.78658e-06	4.84108	2.36708	0.000361163	0.273663	1.99053e-06	7.27365	1.33414	4.72427e-06	3.54107	0.656216
20230702	PF014	F03	Sm ICP ETH	Session #6	Multistatic	300	no activator	1.2 mil	1.2 mil	1.63474	440	0.273676	4.18756e-06	15.3012	1.33412	1.09942e-05	8.24082	1.22916	7.09595e-06	5.773	0.656217	4.71241e-06	7.18117	2.02153	1.2153e-05	6.01176	2.36756	0.000739051	0.273668	4.23954e-06	15.4915	1.33416	9.7e-06	7.27047	0.656215	4.50423e-06	6.86396	2.02158	1.27406e-05	6.3023	2.36754	0.000734146	0.273671	3.07722e-06	11.2442	1.33414	7.37463e-06	5.52761	0.656217
20230702	PF014	F08	Sm ICP ETH	Session #6	Multistatic	300	no activator	1.2 mil	1.2 mil	1.06351	260	0.273666	7.10551e-06	25.9641	1.33409	1.73501e-05	13.0052	1.22917	1.17073e-05	9.52449	0.656216	8.32809e-06	12.6911	2.02152	1.90152e-05	9.40642	2.36369	0.000713027	0.273648	6.74989e-06	24.6663	1.33415	1.59727e-05	11.9722	0.656219	7.50732e-06	11.4403	2.02159	2.22016e-05	10.9822	2.36365	0.000713801	0.273656	5.07142e-06	18.5321	1.33411	1.17258e-05	8.78921	0.656218
20230702	PF014	F09	Sm ICP ETH	Session #6	Multistatic	300	no activator	1.2 mil	1.2 mil	3.24494	260	0.273663	3.81268e-06	13.932	1.3341	9.92255e-06	7.43762	1.22917	7.07121e-06	5.75284	0.656216	4.28826e-06	6.53482	2.02154	1.21997e-05	6.03484	2.36662	0.00098365	0.273661	3.73527e-06	13.6492	1.33416	9.03566e-06	6.77255	0.656209	4.3785e-06	6.67241	2.02158	1.28247e-05	6.34388	2.36662	0.000980394	0.273662	2.81868e-06	10.2999	1.33413	6.80503e-06	5.10071	0.656213
20230703	PF014	F10	Sm ICP ETH	Session #6	Multistatic	300	no activator	1.2 mil	1.2 mil	2.59855	240	0.273673	3.98728e-06	14.5695	1.33411	1.05274e-05	7.89093	1.22917	6.90344e-06	5.61632	0.656212	5.01119e-06	7.63653	2.02153	1.2938e-05	6.40013	2.37055	0.000924462	0.27367	4.46557e-06	16.3174	1.33419	9.84473e-06	7.3788	0.656217	5.10798e-06	7.78398	2.02155	1.40652e-05	6.95765	2.3706	0.000922135	0.273671	3.03326e-06	11.0836	1.33415	7.2461e-06	5.43124	0.656214
20230703	PF014	F11	Sm ICP ETH	Session #6	Multistatic	300	no activator	1.2 mil	1.2 mil	3.73681	460	0.273668	2.36578e-06	8.64469	1.33412	6.29705e-06	4.72002	1.22919	4.62134e-06	3.75967	0.656213	3.07007e-06	4.67846	2.02154	7.89294e-06	3.90442	2.36749	0.000705035	0.273658	2.59502e-06	9.4827	1.33418	6.29516e-06	4.71839	0.656212	3.06192e-06	4.66606	2.02157	7.99574e-06	3.95521	2.36748	0.0007051	0.273663	1.85847e-06	6.79108	1.33415	4.66019e-06	3.49301	0.656213
20240207	PF016	F01	Sm ICP ETH	Session #7	Multistatic	300	no activator	1.2 mil	1.2 mil	3.32989	360	0.273676	3.05682e-06	11.1695	1.33413	7.04832e-06	5.28307	1.2292	5.16531e-06	4.20217	0.656216	3.45951e-06	5.27191	2.02153	9.46336e-06	4.68129	2.36891	0.000784986	0.273671	3.04006e-06	11.1084	1.33423	8.11993e-06	6.08586	0.656225	3.34525e-06	5.09771	2.02153	9.02591e-06	4.46489	2.36893	0.000785202	0.273673	2.27996e-06	8.33097	1.33418	5.20106e-06	3.89832	0.656221
20240207	PF016	F02	Sm ICP ETH	Session #7	Multistatic	300	no activator	1.2 mil	1.2 mil	3.73973	460	0.273675	2.48981e-06	9.09767	1.33413	6.09082e-06	4.56539	1.2292	4.63706e-06	3.77243	0.656219	2.55538e-06	3.8941	2.02153	7.6807e-06	3.79944	2.3675	0.000588169	0.27367	2.38248e-06	8.70565	1.33421	6.20235e-06	4.64872	0.656225	2.83176e-06	4.31523	2.02155	7.66027e-06	3.7893	2.36749	0.000587971	0.273673	1.69139e-06	6.18034	1.33417	4.23314e-06	3.17287	0.656221
20240208	PF016	F03	Sm ICP ETH	Session #7	Multistatic	300	no activator	1.2 mil	1.2 mil	3.06714	540	0.273672	2.50543e-06	9.15485	1.33412	5.9622e-06	4.469	1.2292	4.29512e-06	3.49423	0.656215	2.87837e-06	4.38632	2.02153	8.01028e-06	3.96248	2.36559	0.000497009	0.27367	2.59504e-06	9.48238	1.33421	6.1697e-06	4.62424	0.656224	2.72458e-06	4.15191	2.02154	7.93986e-06	3.92762	2.36559	0.000496603	0.273671	1.90746e-06	6.96988	1.33417	4.2908e-06	3.21608	0.656219
20240208	PF016	F08	Sm ICP ETH	Session #7	Multistatic	300	no activator	1.2 mil	1.2 mil	2.74686	520	0.273675	2.95287e-06	10.7897	1.33413	7.02629e-06	5.26658	1.2292	4.69049e-06	3.8159	0.656212	3.04456e-06	4.6396	2.02153	8.15091e-06	4.03205	2.36343	0.000224046	0.273662	2.78066e-06	10.1609	1.33421	6.42679e-06	4.81693	0.656224	3.16005e-06	4.8155	2.02156	7.65452e-06	3.78645	2.3634	0.000224524	0.273669	2.07732e-06	7.59063	1.33417	4.68783e-06	3.51367	0.656217
20240209	PF016	F10	Sm ICP ETH	Session #7	Multistatic	300	no activator	1.2 mil	1.2 mil	4.06235	540	0.27367	2.19086e-06	8.00549	1.33411	5.39362e-06	4.04286	1.2292	3.97219e-06	3.23154	0.656221	2.2892e-06	3.48846	2.02154	7.20903e-06	3.5661	2.36446	0.000280575	0.273663	2.1945e-06	8.01901	1.33419	5.28869e-06	3.96396	0.656222	2.4793e-06	3.77814	2.02156	6.82491e-06	3.37606	2.36444	0.000280823	0.273667	1.69216e-06	6.18328	1.33415	3.82218e-06	2.86488	0.656221
20240210	PF016	F19	Sm ICP ETH	Session #7	Multistatic	300	no activator	1.2 mil	1.2 mil	5.42482	380	0.273671	2.17419e-06	7.94452	1.33412	5.50224e-06	4.12426	1.2292	3.90564e-06	3.17739	0.656215	2.51069e-06	3.82601	2.02153	7.21097e-06	3.56709	2.36862	0.000727285	0.273666	2.45552e-06	8.97268	1.3342	5.75432e-06	4.31293	0.656227	2.65229e-06	4.04173	2.02155	7.37824e-06	3.64979	2.36862	0.00072746	0.273669	1.66758e-06	6.0934	1.33416	3.98411e-06	2.98624	0.656221
20240212	PF016	F21	Sm ICP ETH	Session #7	Multistatic	300	no activator	1.2 mil	1.2 mil	3.40469	178	0.273673	5.28903e-06	19.3261	1.33411	1.19083e-05	8.92601	1.22919	9.24156e-06	7.51844	0.656222	5.71009e-06	8.70146	2.02155	1.51609e-05	7.49967	2.37254	0.00109719	0.273664	4.71556e-06	17.2312	1.33419	1.09241e-05	8.18784	0.656228	5.2245e-06	7.96141	2.02156	1.3779e-05	6.81604	2.37253	0.00108658	0.273669	3.4762e-06	12.7022	1.33416	7.70914e-06	5.77829	0.656225
20240212	PF016	F12	BE-N #1a	Session #7	Multistatic	300	no activator	1.2 mil	1.2 mil	4.48967	240	0.273667	2.90265e-06	10.6065	1.33412	7.25619e-06	5.43894	1.22921	5.38315e-06	4.37935	0.656217	3.1313e-06	4.77175	2.02155	9.9254e-06	4.90979	2.36282	0.000328005	0.273661	3.45644e-06	12.6304	1.3342	8.09726e-06	6.069	0.65623	3.66778e-06	5.58917	2.02158	9.66341e-06	4.78012	2.36281	0.000328606	0.273664	2.20156e-06	8.04473	1.33416	5.62992e-06	4.21982	0.656224
20240212	PF016	F16	BE-N #1b	Session #7	Multistatic	300	no activator	1.2 mil	1.2 mil	2.50541	380	0.273666	3.23324e-06	11.8145	1.3341	8.5891e-06	6.43811	1.22921	6.1327e-06	4.98913	0.656221	3.62445e-06	5.52322	2.02157	1.04667e-05	5.17749	2.36845	0.000562668	0.273659	3.21844e-06	11.7608	1.33421	7.73735e-06	5.7992	0.65623	3.8474e-06	5.86288	2.02158	1.02739e-05	5.08214	2.36846	0.000562686	0.273663	2.43493e-06	8.89753	1.33415	5.96943e-06	4.47432	0.656227
20240213	PF016	F17	BE-N #1c	Session #7	Multistatic	300	no activator	1.2 mil	1.2 mil	4.32286	600	0.273666	1.96852e-06	7.19314	1.33411	5.15041e-06	3.86056	1.2292	3.2681e-06	2.65873	0.656219	2.104e-06	3.20625	2.02157	6.1423e-06	3.03838	2.37033	0.000567118	0.273661	1.90611e-06	6.96523	1.3342	4.98586e-06	3.73697	0.656226	2.2027e-06	3.35662	2.02157	6.34769e-06	3.13998	2.37033	0.000566543	0.273663	1.42847e-06	5.2198	1.33415	3.47135e-06	2.60191	0.656222
20240213	PF016	F14	Allende	Session #7	Multistatic	250	no activator	1.2 mil	1.2 mil	5.40461	420	0.273628	2.1801e-06	7.96741	1.33412	5.43183e-06	4.07146	1.22915	3.98013e-06	3.23811	0.65626	2.68098e-06	4.08524	2.02155	6.65406e-06	3.29156	2.36955	0.000332049	0.273623	2.00721e-06	7.33566	1.3342	5.28597e-06	3.96188	0.656287	2.21403e-06	3.37358	2.02158	7.28147e-06	3.60187	2.36955	0.000331055	0.273626	1.47862e-06	5.40378	1.33417	3.63335e-06	2.72331	0.656274
20240403	PF017	F02	Sm ICP ETH	Session #8	Multistatic	300	no activator	1.2 mil	1.2 mil	3.34376	340	0.27368	3.12467e-06	11.4173	1.33413	7.73803e-06	5.80005	1.2292	5.62328e-06	4.57474	0.656215	3.37512e-06	5.14331	2.02152	9.78116e-06	4.83851	2.36853	0.000641411	0.273677	3.23575e-06	11.8233	1.33423	7.44231e-06	5.578	0.656232	3.44849e-06	5.25499	2.02155	1.02875e-05	5.08894	2.36854	0.000641077	0.273679	2.38861e-06	8.72778	1.33418	5.72596e-06	4.29174	0.656224
20240403	PF017	F03	Sm ICP ETH	Session #8	Multistatic	300	no activator	1.2 mil	1.2 mil	4.19567	600	0.273675	1.99034e-06	7.27262	1.33412	5.19584e-06	3.89458	1.2292	3.44017e-06	2.79871	0.656214	2.23956e-06	3.41285	2.02152	6.17452e-06	3.05439	2.36832	0.00051143	0.273673	2.09961e-06	7.67197	1.33421	5.33656e-06	3.99978	0.656225	2.38419e-06	3.63319	2.02155	6.58324e-06	3.25653	2.36831	0.000510864	0.273674	1.39939e-06	5.11336	1.33417	3.75574e-06	2.81505	0.656219
20240404	PF017	F08	Sm ICP ETH	Session #8	Multistatic	300	no activator	1.2 mil	1.2 mil	3.76851	180	0.273674	3.53711e-06	12.9245	1.33412	8.66716e-06	6.49653	1.22919	6.13769e-06	4.99327	0.656217	4.24733e-06	6.47244	2.02155	1.18711e-05	5.87227	2.37237	0.000997334	0.273672	3.53676e-06	12.9233	1.3342	1.01293e-05	7.59206	0.656228	4.54131e-06	6.92032	2.02155	1.23854e-05	6.12669	2.37239	0.000996179	0.273675	2.46626e-06	9.01164	1.33416	6.09449e-06	4.56804	0.656223
20240404	PF017	F09	Sm ICP ETH	Session #8	Multistatic	300	no activator	1.2 mil	1.2 mil	3.73746	562	0.273675	2.20405e-06	8.05352	1.33412	5.51234e-06	4.13181	1.2292	4.15669e-06	3.38162	0.656212	2.46991e-06	3.76389	2.02152	7.14272e-06	3.53334	2.36857	0.000683175	0.273667	2.2342e-06	8.16394	1.33421	5.88969e-06	4.41437	0.656228	2.57873e-06	3.92963	2.02155	7.16605e-06	3.54483	2.36857	0.000685373	0.273671	1.61917e-06	5.91648	1.33417	4.09546e-06	3.06968	0.65622
20240404	PF017	F10	Sm ICP ETH	Session #8	Multistatic	300	no activator	1.2 mil	1.2 mil	3.63841	160	0.273679	4.79878e-06	17.5343	1.33413	1.06119e-05	7.95419	1.22919	7.36588e-06	5.99247	0.656213	5.09931e-06	7.7708	2.02153	1.4257e-05	7.05254	2.37101	0.000977417	0.273671	4.50068e-06	16.4456	1.3342	1.16038e-05	8.69725	0.656221	4.73948e-06	7.22238	2.02157	1.46448e-05	7.24429	2.37099	0.000982766	0.273675	3.02144e-06	11.0402	1.33416	7.56384e-06	5.66935	0.656216
20240404	PF017	F11	Sm ICP ETH	Session #8	Multistatic	300	no activator	1.2 mil	1.2 mil	3.06363	220	0.273675	3.91157e-06	14.2927	1.33411	9.85812e-06	7.38929	1.22919	6.78071e-06	5.51642	0.656207	4.36033e-06	6.64475	2.02154	1.23895e-05	6.12871	2.36901	0.000742819	0.273675	3.84919e-06	14.0648	1.33422	9.57086e-06	7.17336	0.656223	4.23416e-06	6.45231	2.02156	1.1077e-05	5.47944	2.36902	0.000743648	0.273675	2.9414e-06	10.7478	1.33417	7.26172e-06	5.4429	0.656216
20240405	PF017	F12	Sm ICP ETH	Session #8	Multistatic	300	no activator	1.2 mil	1.2 mil	3.52193	240	0.273678	3.54233e-06	12.9434	1.33412	8.89709e-06	6.66889	1.2292	6.31795e-06	5.1399	0.656213	3.56593e-06	5.43411	2.02154	1.09797e-05	5.43137	2.36878	0.000594236	0.273668	3.63013e-06	13.2647	1.33421	8.75875e-06	6.56475	0.656227	3.79643e-06	5.78524	2.02156	1.05402e-05	5.21388	2.36877	0.000595876	0.273675	2.54155e-06	9.28675	1.33416	6.42679e-06	4.8171	0.656221
20240405	PF017	F13	SRM 3147a	Session #8	Multistatic	300	no activator	1.2 mil	1.2 mil	3.66941	240	0.273668	3.49243e-06	12.7615	1.3341	8.56023e-06	6.41646	1.2292	6.25703e-06	5.09034	0.656215	3.6979e-06	5.6352	2.02156	1.14473e-05	5.66262	2.37051	0.00084564	0.273661	3.45587e-06	12.6283	1.3342	8.66631e-06	6.49553	0.656227	3.96269e-06	6.03859	2.0216	1.1104e-05	5.49267	2.3705	0.000849289	0.273666	2.47917e-06	9.05913	1.33415	6.48845e-06	4.86335	0.656221
20240405	PF017	F14	SRM 3147a	Session #8	Multistatic	300	no activator	1.2 mil	1.2 mil	3.80972	500	0.273664	2.31438e-06	8.45702	1.33412	5.71222e-06	4.28165	1.22922	4.08456e-06	3.32289	0.656221	2.53943e-06	3.86978	2.02155	7.42086e-06	3.67087	2.3649	0.000620924	0.273662	2.27555e-06	8.31517	1.3342	5.91482e-06	4.43324	0.656229	2.56008e-06	3.90121	2.02158	7.60107e-06	3.75996	2.36489	0.000621098	0.273663	1.65762e-06	6.05715	1.33416	4.07951e-06	3.05774	0.656226
20240406	PF017	F15	SRM 3147a	Session #8	Multistatic	300	no activator	1.2 mil	1.2 mil	3.9962	240	0.273659	3.20695e-06	11.7188	1.33412	8.08621e-06	6.0611	1.2292	6.1467e-06	5.00056	0.656215	3.8408e-06	5.85295	2.02155	1.02156e-05	5.05333	2.36493	0.0002516	0.273657	3.12465e-06	11.4181	1.3342	8.5398e-06	6.40068	0.656229	3.4456e-06	5.2506	2.02159	1.00544e-05	4.97354	2.36493	0.000252614	0.273658	2.13595e-06	7.80517	1.33416	6.02605e-06	4.51674	0.656223
20240406	PF017	F16	SRM 3147a	Session #8	Multistatic	300	no activator	1.2 mil	1.2 mil	3.73983	320	0.273663	3.29872e-06	12.0539	1.33411	8.0685e-06	6.04786	1.22921	5.79921e-06	4.71783	0.656219	3.30961e-06	5.04346	2.02157	9.46773e-06	4.68336	2.36727	0.000558054	0.273664	2.71031e-06	9.90382	1.3342	6.9284e-06	5.19292	0.656236	3.54404e-06	5.40056	2.02158	8.45641e-06	4.18307	2.36727	0.000559834	0.273664	2.22692e-06	8.13743	1.33415	5.61039e-06	4.20521	0.656228
20240408	PF018	F14	SRM 3147a	Session #8	Multistatic	300	no activator	1.2 mil	1.2 mil	3.18144	340	0.273668	3.20831e-06	11.7234	1.3341	8.22399e-06	6.16443	1.22921	5.5849e-06	4.54348	0.656224	3.48906e-06	5.31688	2.02157	1.02608e-05	5.07564	2.37118	0.000921835	0.273663	3.12095e-06	11.4044	1.3342	7.66679e-06	5.74637	0.656237	3.526e-06	5.37307	2.02159	9.83642e-06	4.86568	2.37118	0.000923581	0.273666	2.30133e-06	8.40928	1.33415	5.33057e-06	3.99548	0.65623
20240408	PF018	F15	SRM 3147a	Session #8	Multistatic	300	no activator	1.2 mil	1.2 mil	3.51895	430	0.273662	2.76595e-06	10.1072	1.3341	6.77603e-06	5.07909	1.22921	4.75233e-06	3.86616	0.656216	2.94721e-06	4.49122	2.02155	8.65864e-06	4.28316	2.36884	0.00092417	0.273662	2.5973e-06	9.49089	1.33421	6.62136e-06	4.96278	0.656234	2.95192e-06	4.49827	2.02157	8.02009e-06	3.96725	2.36885	0.000927056	0.273662	1.99065e-06	7.27414	1.33415	4.92784e-06	3.69362	0.656225
20240410	PF018	F16	SRM 3147a	Session #8	Multistatic	300	no activator	1.2 mil	1.2 mil	3.22673	720	0.273659	2.29818e-06	8.39797	1.33411	5.40128e-06	4.04861	1.22921	3.91718e-06	3.18675	0.656219	2.48283e-06	3.78353	2.02155	6.88957e-06	3.40806	2.3694	0.000716919	0.27366	2.29421e-06	8.38344	1.33419	5.26349e-06	3.94507	0.656231	2.30851e-06	3.51783	2.02158	6.82431e-06	3.37573	2.36939	0.000717325	0.27366	1.58792e-06	5.80253	1.33415	3.52434e-06	2.64164	0.656225
20240416	PF019	F02	SRM 3147a	Session #8	Multistatic	300	no activator	1.2 mil	1.2 mil	3.42781	360	0.273659	2.97177e-06	10.8594	1.3341	6.67319e-06	5.00203	1.22921	5.05399e-06	4.11156	0.656219	3.14976e-06	4.79987	2.02156	9.1234e-06	4.51304	2.37104	0.000835438	0.27366	3.03456e-06	11.0888	1.33421	7.28155e-06	5.45758	0.656233	2.95954e-06	4.5099	2.02159	9.32669e-06	4.61354	2.37107	0.000836485	0.27366	2.14839e-06	7.85059	1.33415	5.12301e-06	3.83989	0.656226
20240416	PF019	F03	SRM 3147a	Session #8	Multistatic	300	no activator	1.2 mil	1.2 mil	3.68034	480	0.273661	2.47752e-06	9.05325	1.3341	6.07478e-06	4.55346	1.22921	4.4556e-06	3.62476	0.656222	2.76973e-06	4.22073	2.02158	8.17087e-06	4.04183	2.36807	0.000584914	0.273659	2.54752e-06	9.30912	1.3342	6.04329e-06	4.52954	0.656235	2.7884e-06	4.24909	2.02159	8.11955e-06	4.01642	2.36807	0.000585409	0.273659	1.79806e-06	6.57044	1.33415	4.22296e-06	3.16529	0.656228
20240417	PF019	F04	SRM 3147a	Session #8	Multistatic	300	no activator	1.2 mil	1.2 mil	3.68703	660	0.27366	2.10485e-06	7.69147	1.33411	5.23589e-06	3.92464	1.22921	3.75156e-06	3.05202	0.656214	2.38802e-06	3.63908	2.02157	6.25166e-06	3.09248	2.36904	0.000552887	0.273659	2.1628e-06	7.90324	1.3342	5.2075e-06	3.90308	0.656229	2.35349e-06	3.58639	2.02158	6.5483e-06	3.23919	2.36905	0.000552576	0.273659	1.50336e-06	5.49354	1.33415	3.64956e-06	2.73548	0.656222
20240418	PF019	F05	SRM 3147a	Session #8	Multistatic	300	no activator	1.2 mil	1.2 mil	3.44693	360	0.27366	2.92647e-06	10.6938	1.3341	7.51953e-06	5.63639	1.22921	5.53865e-06	4.50586	0.656218	3.30487e-06	5.03624	2.02156	9.47673e-06	4.68783	2.3693	0.000723904	0.273659	2.99744e-06	10.9532	1.3342	7.30141e-06	5.47249	0.656232	3.28296e-06	5.00274	2.02159	9.2711e-06	4.58605	2.36933	0.000725559	0.27366	2.24238e-06	8.19403	1.33415	5.49326e-06	4.11742	0.656224
20240419	PF019	F06	SRM 3147a	Session #8	Multistatic	300	no activator	1.2 mil	1.2 mil	3.05642	340	0.273662	3.45099e-06	12.6104	1.33411	9.02227e-06	6.76278	1.22919	5.9899e-06	4.87304	0.656221	3.54264e-06	5.39854	2.02158	1.07979e-05	5.3413	2.37735	0.00116168	0.273667	3.37919e-06	12.3478	1.3342	8.55336e-06	6.41086	0.656222	3.46956e-06	5.28717	2.02157	1.03396e-05	5.11464	2.37739	0.00116442	0.273664	2.44416e-06	8.93125	1.33415	6.22292e-06	4.66434	0.656221
20240420	PF019	F07	SRM 3147a	Session #8	Multistatic	300	no activator	1.2 mil	1.2 mil	3.29031	600	0.273662	2.23941e-06	8.18315	1.3341	5.38777e-06	4.03849	1.2292	4.04544e-06	3.29111	0.656218	2.57788e-06	3.92839	2.02157	7.20498e-06	3.56406	2.36821	0.000391588	0.273659	2.35201e-06	8.59469	1.3342	5.87734e-06	4.40515	0.656231	2.59915e-06	3.96073	2.0216	6.96339e-06	3.4445	2.36821	0.000393492	0.273661	1.62271e-06	5.92963	1.33415	3.84209e-06	2.8798	0.656224
20240421	PF019	F08	SRM 3147a	Session #8	Multistatic	300	no activator	1.2 mil	1.2 mil	3.49406	360	0.273658	2.99707e-06	10.9519	1.3341	6.59502e-06	4.94344	1.2292	4.86862e-06	3.9608	0.656221	3.18533e-06	4.85406	2.02157	8.5207e-06	4.21489	2.37253	0.00111213	0.273663	2.79262e-06	10.2046	1.33419	7.0716e-06	5.30028	0.65623	3.39357e-06	5.17132	2.02158	8.60073e-06	4.25447	2.37256	0.00111545	0.27366	2.16323e-06	7.90481	1.33414	5.15047e-06	3.8605	0.656227
20240408	PF018	F01	UB-N	Session #8	Multistatic	300	no activator	1.2 mil	1.2 mil	3.86361	200	0.273664	3.65019e-06	13.3382	1.3341	9.22292e-06	6.91323	1.22921	7.22054e-06	5.87414	0.656219	3.98256e-06	6.06895	2.02156	1.13145e-05	5.59694	2.36745	0.000712279	0.273665	3.70071e-06	13.5228	1.3342	9.87655e-06	7.40259	0.656238	3.98386e-06	6.07076	2.02159	1.19699e-05	5.92105	2.36747	0.000709332	0.273664	2.48756e-06	9.08986	1.33415	6.52467e-06	4.89051	0.65623
20240409	PF018	F02	BE-N #2a	Session #8	Multistatic	300	no activator	1.2 mil	1.2 mil	3.44203	280	0.273665	3.23356e-06	11.8158	1.33413	7.75391e-06	5.81198	1.22921	5.19448e-06	4.22588	0.656214	3.65233e-06	5.56577	2.02156	1.03495e-05	5.11956	2.36934	0.000763353	0.273668	3.23171e-06	11.8089	1.33421	8.77202e-06	6.57471	0.656234	3.51414e-06	5.35501	2.02156	1.00381e-05	4.96553	2.36936	0.000763688	0.273666	2.53463e-06	9.26176	1.33417	6.11349e-06	4.58225	0.656223
20240409	PF018	F03	BE-N #2b	Session #8	Multistatic	300	no activator	1.2 mil	1.2 mil	3.58005	440	0.273662	2.52457e-06	9.22513	1.33411	6.01033e-06	4.50513	1.22921	4.50706e-06	3.66664	0.656217	3.12018e-06	4.75479	2.02155	7.57037e-06	3.74484	2.36812	0.000660679	0.273664	2.44932e-06	8.9501	1.3342	6.23238e-06	4.67125	0.656237	2.90975e-06	4.43399	2.02157	7.93856e-06	3.92693	2.36814	0.000659389	0.273662	1.76316e-06	6.44283	1.33415	4.08666e-06	3.06311	0.656227
20240410	PF018	F08	BHVO-2 #2a	Session #8	Multistatic	300	no activator	1.2 mil	1.2 mil	3.44276	353	0.273666	3.03033e-06	11.0731	1.3341	8.13952e-06	6.10113	1.2292	5.44322e-06	4.42826	0.656219	3.41557e-06	5.20493	2.02157	9.51806e-06	4.70825	2.37133	0.000679394	0.273667	3.47916e-06	12.7131	1.33419	8.79544e-06	6.59233	0.656229	3.71745e-06	5.66486	2.02159	9.86058e-06	4.87764	2.3714	0.000699541	0.273666	2.39712e-06	8.7593	1.33415	5.93443e-06	4.4481	0.656224
20240417	PF019	F01	BHVO-2 #2b	Session #8	Multistatic	300	no activator	1.2 mil	1.2 mil	2.32584	140	0.273666	5.53554e-06	20.2274	1.3341	1.42452e-05	10.6777	1.22921	9.82261e-06	7.99097	0.656212	6.78374e-06	10.3377	2.02154	1.94096e-05	9.60138	2.36874	0.000733347	0.273657	5.72297e-06	20.9129	1.3342	1.5011e-05	11.251	0.656236	6.2761e-06	9.56379	2.02158	1.90894e-05	9.44278	2.36875	0.000732773	0.273664	4.19933e-06	15.3448	1.33415	9.03704e-06	6.77365	0.656226
20240409	PF018	F10	Sm ICP ETH processed #1	Session #8	Multistatic	300	no activator	1.2 mil	1.2 mil	3.16126	230	0.273671	3.91245e-06	14.2961	1.33412	9.80897e-06	7.35239	1.2292	6.55313e-06	5.33121	0.656211	4.14112e-06	6.31065	2.02153	1.11339e-05	5.50767	2.36761	0.000460563	0.273677	4.03107e-06	14.7293	1.33422	1.00287e-05	7.51653	0.656228	4.37349e-06	6.6646	2.02155	1.24842e-05	6.17556	2.36761	0.000461715	0.273673	3.00103e-06	10.9657	1.33417	7.30605e-06	5.4761	0.656219
20240410	PF018	F11	Sm ICP ETH processed #2	Session #8	Multistatic	300	no activator	1.2 mil	1.2 mil	3.84539	370	0.273673	2.82024e-06	10.3052	1.33411	6.52262e-06	4.88912	1.2292	4.62813e-06	3.76516	0.656217	3.06442e-06	4.66983	2.02154	8.32252e-06	4.11693	2.36751	0.000495741	0.273667	2.67306e-06	9.76756	1.33419	6.69537e-06	5.0183	0.656229	3.16527e-06	4.82342	2.02156	8.34785e-06	4.1294	2.36749	0.000495528	0.27367	2.04012e-06	7.45469	1.33415	4.69596e-06	3.51981	0.656223
20240528	PF020	F01	Sm ICP LMV	Session #9	Multistatic	300	no activator	1.2 mil	1.2 mil	4.02406	460	0.273665	2.4355e-06	8.89956	1.33412	5.99979e-06	4.4972	1.22921	3.97763e-06	3.23592	0.656218	2.66073e-06	4.05465	2.02157	7.61627e-06	3.7675	2.37024	0.000675207	0.273658	2.26238e-06	8.26719	1.33422	5.84194e-06	4.37854	0.656232	2.61522e-06	3.9852	2.02158	7.52363e-06	3.72167	2.37024	0.000676401	0.273661	1.64979e-06	6.02857	1.33417	4.12012e-06	3.08815	0.656225
20240528	PF020	F02	Sm ICP LMV	Session #9	Multistatic	300	no activator	1.2 mil	1.2 mil	3.53958	180	0.27367	4.03155e-06	14.7314	1.33412	1.02119e-05	7.65441	1.22922	6.35056e-06	5.16632	0.656217	4.54862e-06	6.93157	2.02153	1.35965e-05	6.72587	2.37131	0.000714273	0.273663	3.99178e-06	14.5865	1.33422	9.32412e-06	6.98846	0.656243	4.87538e-06	7.42924	2.02156	1.26986e-05	6.28158	2.37132	0.000713239	0.273666	2.71204e-06	9.91002	1.33417	6.66245e-06	4.99369	0.656229
20240528	PF020	F03	Sm ICP LMV	Session #9	Multistatic	300	no activator	1.2 mil	1.2 mil	3.37162	700	0.27366	2.14242e-06	7.82879	1.33412	5.07693e-06	3.80547	1.22922	3.54927e-06	2.88742	0.656217	2.40198e-06	3.66035	2.02155	6.44804e-06	3.18965	2.36899	0.000497441	0.273656	2.18432e-06	7.98198	1.33421	5.3811e-06	4.03319	0.656229	2.28316e-06	3.47921	2.02157	6.14918e-06	3.04178	2.36899	0.000497287	0.273659	1.55945e-06	5.69852	1.33416	3.84449e-06	2.88159	0.656223
20240529	PF020	F04	Sm ICP LMV	Session #9	Multistatic	300	no activator	1.2 mil	1.2 mil	4.21623	800	0.273658	1.83333e-06	6.69937	1.33412	4.15296e-06	3.1129	1.22922	2.81708e-06	2.29177	0.656222	1.98077e-06	3.01845	2.02156	5.60491e-06	2.77257	2.36508	0.000548323	0.273656	1.67601e-06	6.12451	1.3342	4.29191e-06	3.21684	0.656232	2.00108e-06	3.04935	2.02157	5.33866e-06	2.64086	2.36508	0.000548665	0.273657	1.21313e-06	4.43302	1.33416	3.01124e-06	2.25704	0.656227
20240603	PF021	F01	Sm ICP LMV	Session #9	Multistatic	300	no activator	1.2 mil	1.2 mil	3.95393	800	0.273655	1.84471e-06	6.74101	1.33411	4.54999e-06	3.41051	1.22921	3.18101e-06	2.58784	0.656217	2.00027e-06	3.04818	2.02157	5.65302e-06	2.79636	2.36772	0.000517608	0.273654	1.84426e-06	6.73938	1.3342	4.42204e-06	3.31438	0.656228	1.96448e-06	2.99359	2.02158	5.61344e-06	2.77675	2.36772	0.000517511	0.273655	1.34738e-06	4.92365	1.33415	3.0366e-06	2.27605	0.656223
20240603	PF021	F02	Sm ICP LMV	Session #9	Multistatic	300	no activator	1.2 mil	1.2 mil	4.27847	600	0.273663	1.99622e-06	7.29444	1.33411	5.04534e-06	3.7818	1.2292	3.62464e-06	2.94877	0.656219	2.20074e-06	3.35366	2.02156	6.29847e-06	3.11565	2.37118	0.000627454	0.273662	1.9726e-06	7.20815	1.3342	4.953e-06	3.71233	0.656233	2.26862e-06	3.45703	2.02158	6.12569e-06	3.03014	2.37116	0.000628132	0.273663	1.42112e-06	5.19294	1.33416	3.60991e-06	2.70576	0.656226
20240608	PF021	F03	Sm ICP LMV	Session #9	Multistatic	300	no activator	1.2 mil	1.2 mil	4.53427	780	0.273659	1.74047e-06	6.36001	1.33411	4.43865e-06	3.32705	1.22921	2.8995e-06	2.35884	0.656219	1.98106e-06	3.0189	2.02158	5.41583e-06	2.67901	2.36924	0.000482974	0.273659	1.72082e-06	6.28818	1.3342	4.23248e-06	3.1723	0.656232	1.8949e-06	2.88755	2.02158	5.43476e-06	2.68837	2.36925	0.000483305	0.273659	1.28863e-06	4.70888	1.33416	3.16277e-06	2.37062	0.656226
20240609	PF021	F04	Sm ICP LMV	Session #9	Multistatic	300	no activator	1.2 mil	1.2 mil	4.56425	620	0.273659	1.96559e-06	7.1826	1.33411	5.00072e-06	3.74836	1.22921	3.43871e-06	2.79749	0.65622	2.11104e-06	3.21697	2.02158	6.26908e-06	3.10108	2.36822	0.000477111	0.273659	1.78549e-06	6.52452	1.33421	4.49959e-06	3.37248	0.656233	2.11142e-06	3.21748	2.02157	5.6341e-06	2.787	2.36824	0.000476875	0.273659	1.28295e-06	4.68815	1.33416	3.26583e-06	2.44786	0.656226
20240610	PF021	F09	Sm ICP LMV	Session #9	Multistatic	300	no activator	1.2 mil	1.2 mil	3.66801	300	0.27366	3.29606e-06	12.0444	1.3341	7.32472e-06	5.49036	1.22922	5.35207e-06	4.35405	0.656219	3.53397e-06	5.38535	2.02157	9.61161e-06	4.75453	2.36813	0.000725437	0.273656	3.14618e-06	11.4968	1.33419	7.99396e-06	5.99164	0.656231	3.46177e-06	5.27523	2.02158	1.06374e-05	5.26192	2.36812	0.000722058	0.273658	2.41187e-06	8.81346	1.33414	5.62099e-06	4.21318	0.656226
20240529	PF020	F09	Sm ICP ETH	Session #9	Multistatic	300	no activator	1.2 mil	1.2 mil	3.05165	460	0.273673	2.55633e-06	9.3408	1.33411	6.40748e-06	4.80281	1.22919	4.58082e-06	3.72669	0.656213	2.89407e-06	4.41026	2.02153	8.41633e-06	4.16334	2.36826	0.00061904	0.273669	2.54944e-06	9.31578	1.3342	6.91935e-06	5.18613	0.656229	3.11908e-06	4.75303	2.02157	8.50271e-06	4.206	2.36824	0.000618929	0.273671	1.86474e-06	6.8138	1.33416	4.64705e-06	3.48313	0.656222
20240529	PF020	F10	Sm ICP ETH	Session #9	Multistatic	300	no activator	1.2 mil	1.2 mil	3.56656	220	0.273677	3.76473e-06	13.7561	1.33412	8.68834e-06	6.5124	1.22919	5.60722e-06	4.5617	0.656216	4.23415e-06	6.45238	2.02153	1.29958e-05	6.4287	2.36666	0.000959668	0.27367	3.76655e-06	13.7631	1.33421	9.01136e-06	6.75407	0.656224	4.03689e-06	6.1517	2.02154	1.13368e-05	5.60802	2.36668	0.000958908	0.273673	2.7625e-06	10.0941	1.33417	6.24268e-06	4.67908	0.65622
20240530	PF020	F11	Sm ICP ETH	Session #9	Multistatic	300	no activator	1.2 mil	1.2 mil	3.26734	360	0.273679	2.97845e-06	10.883	1.33414	7.26234e-06	5.44348	1.2292	5.42461e-06	4.41312	0.656214	3.2143e-06	4.89824	2.02152	9.14886e-06	4.52574	2.36845	0.000613605	0.273679	2.93022e-06	10.7068	1.33422	7.55698e-06	5.66398	0.656235	3.24507e-06	4.94498	2.02154	9.74221e-06	4.8192	2.36846	0.000611126	0.273679	2.15022e-06	7.85674	1.33417	5.0507e-06	3.78564	0.656225
20240531	PF020	F12	Sm ICP ETH	Session #9	Multistatic	300	no activator	1.2 mil	1.2 mil	3.70232	480	0.273675	2.45455e-06	8.96884	1.33413	5.88624e-06	4.41206	1.2292	4.44469e-06	3.61592	0.656207	2.6989e-06	4.11287	2.02152	7.60599e-06	3.76252	2.36777	0.000758722	0.273673	2.51325e-06	9.18339	1.33421	5.79183e-06	4.341	0.656231	2.86504e-06	4.36589	2.02154	7.88268e-06	3.89934	2.36778	0.000758961	0.273674	1.71681e-06	6.2732	1.33417	4.24263e-06	3.17997	0.656219
20240601	PF020	F13	Sm ICP ETH	Session #9	Multistatic	300	no activator	1.2 mil	1.2 mil	3.586	300	0.273677	3.06419e-06	11.1964	1.33413	7.96215e-06	5.96803	1.2292	5.17686e-06	4.21157	0.65621	3.27488e-06	4.99059	2.02151	9.568e-06	4.7331	2.36906	0.00100056	0.273671	3.18859e-06	11.6512	1.33421	7.66455e-06	5.74464	0.656224	3.17361e-06	4.83617	2.02153	1.03731e-05	5.1313	2.36907	0.000999758	0.273674	2.23424e-06	8.16386	1.33417	5.4223e-06	4.06416	0.656217
20240604	PF021	F11	Sm ICP ETH	Session #9	Multistatic	300	no activator	1.2 mil	1.2 mil	3.84571	500	0.273676	2.30005e-06	8.40427	1.33412	5.60521e-06	4.20144	1.22919	4.75482e-06	3.86825	0.656209	2.54789e-06	3.88274	2.02154	7.20205e-06	3.56265	2.36929	0.000682465	0.273677	2.67113e-06	9.76015	1.33422	6.57178e-06	4.92554	0.656225	2.53443e-06	3.86214	2.02154	8.11861e-06	4.01606	2.36932	0.000681945	0.273677	1.7913e-06	6.54532	1.33417	4.49588e-06	3.36979	0.656216
20240606	PF021	F12	Sm ICP ETH	Session #9	Multistatic	300	no activator	1.2 mil	1.2 mil	3.547	640	0.273671	1.97772e-06	7.22663	1.33411	5.2303e-06	3.92043	1.2292	3.54185e-06	2.88143	0.656216	2.27799e-06	3.4714	2.02155	6.69855e-06	3.31358	2.36693	0.00055679	0.27367	2.12326e-06	7.75844	1.33421	5.2374e-06	3.92546	0.656227	2.51216e-06	3.82819	2.02155	6.44814e-06	3.1897	2.36695	0.000555801	0.273671	1.46666e-06	5.35922	1.33416	3.58899e-06	2.69007	0.656221
20240614	PF022	F17	Sm ICP ETH	Session #9	Multistatic	300	no activator	1.2 mil	1.2 mil	3.72095	540	0.273671	2.34762e-06	8.57827	1.33411	5.68802e-06	4.26352	1.2292	4.08415e-06	3.32262	0.65622	2.56581e-06	3.90998	2.02154	7.05353e-06	3.48919	2.36492	0.000617289	0.273669	2.27366e-06	8.30807	1.3342	5.44638e-06	4.08213	0.656232	2.50607e-06	3.81888	2.02154	7.27451e-06	3.5985	2.36492	0.000616408	0.27367	1.69679e-06	6.20013	1.33416	3.87264e-06	2.90269	0.656225
20240530	PF020	F14	BHVO-2 #3	Session #9	Multistatic	360	no activator	1.2 mil	1.2 mil	4.05949	360	0.27367	2.69474e-06	9.84669	1.33412	6.59146e-06	4.94069	1.22922	4.60661e-06	3.74759	0.656212	2.99719e-06	4.56741	2.02155	8.63995e-06	4.27392	2.36844	0.00055908	0.273666	2.68594e-06	9.81466	1.33422	6.30829e-06	4.72807	0.656232	2.85976e-06	4.35785	2.02157	7.65862e-06	3.78845	2.36845	0.000559481	0.273668	1.93002e-06	7.0524	1.33417	4.38685e-06	3.28808	0.656223
20240601	PF020	F16	BE-N #2c	Session #9	Multistatic	300	no activator	1.2 mil	1.2 mil	3.22632	220	0.273659	3.77493e-06	13.7943	1.3341	9.92967e-06	7.44295	1.22921	7.06864e-06	5.75056	0.65621	4.5045e-06	6.86442	2.02157	1.13642e-05	5.62149	2.36933	0.00105247	0.27366	3.98101e-06	14.5473	1.33421	9.91317e-06	7.43	0.656224	4.61565e-06	7.03366	2.02156	1.30293e-05	6.44518	2.36938	0.00105368	0.27366	2.90011e-06	10.5975	1.33416	6.78647e-06	5.08672	0.656218
20240606	PF021	F16	BHVO-2 #2c	Session #9	Multistatic	300	no activator	1.2 mil	1.2 mil	4.62711	300	0.273664	2.73187e-06	9.98258	1.33411	7.38727e-06	5.53723	1.22921	4.84559e-06	3.94204	0.656211	3.00609e-06	4.58098	2.02155	8.64724e-06	4.27753	2.36411	0.000542529	0.273668	2.66717e-06	9.74598	1.33422	6.37601e-06	4.77883	0.656235	3.06243e-06	4.66666	2.02157	8.79647e-06	4.3513	2.36413	0.000542629	0.273667	1.85919e-06	6.79362	1.33417	4.72182e-06	3.53916	0.656224
20240607	PF021	F17	BE-N #2d	Session #9	Multistatic	300	no activator	1.2 mil	1.2 mil	3.67754	500	0.273665	2.28714e-06	8.35744	1.33411	5.86619e-06	4.39707	1.22921	4.2275e-06	3.43919	0.656217	2.64898e-06	4.03675	2.02156	7.7216e-06	3.81963	2.3677	0.000510411	0.273662	2.28988e-06	8.36754	1.33421	5.9497e-06	4.45936	0.656234	2.63516e-06	4.01558	2.02157	7.48058e-06	3.70038	2.3677	0.000509307	0.273663	1.59887e-06	5.8425	1.33416	4.13144e-06	3.09666	0.656226
[truncated: 8 more columns]

## Sheet: 5. Dynamic 2 lines 152Sm-148Sm
Dynamic 2 lines method - corrected for mass fractionation with 152Sm/148Sm=2.37689
												L1			L1			L1			L1			L2			L2			L2			Multi-Static			Multi-Static			Dynamic			L1		L2		L1	L2
Date	Barrel	Filament	Sample	Session	Method	Mass (ng)	Loading	EVAP	IONI	I152Sm (V)	n	144Sm/148Sm	2 SE	2 RSE (ppm)	147Sm/148Sm	2 SE	2 RSE (ppm)	150Sm/148Sm	2 SE	2 RSE (ppm)	154Sm/148Sm	2 SE	2 RSE (ppm)	149Sm/148Sm	2 SE	2 RSE (ppm)	150Sm/148Sm	2 SE	2 RSE (ppm)	154Sm/148Sm	2 SE	2 RSE (ppm)	150Sm/148Sm	2 SE	2 RSE (ppm)	154Sm/148Sm	2 SE	2 RSE (ppm)	144Sm/148Sm	2 SE	2 RSE (ppm)	152Sm/148Sm	2 SE	152Sm/148Sm	2 SE	146Nd/152Sm	156Gd/152Sm		Efficiency (%)
20220915	PF005	F02	Sm ICP ETH	Session #2	Dynamic 2 lines	300	H3PO4	1.6 mil	1.6 mil	3.88312	360	0.273653	2.59862e-06	9.49604	1.3341	6.44874e-06	4.83378	0.656225	2.90618e-06	4.42864	2.0216	8.10324e-06	4.00833	1.22913	4.97365e-06	4.04649	0.656203	4.04649	4.89819	2.02157	8.48569e-06	4.19758	0.656214	2.16087e-06	3.29294	2.02158	6.00834e-06	2.9721	0.273651	2.11349e-06	7.72331	2.368	0.000978477	2.36801	0.000978975	8.82738e-06	3.69302e-06		0.00215358
20220915	PF005	F09	Sm ICP ETH	Session #2	Dynamic 2 lines	300	H3PO4	1.6 mil	1.6 mil	6.45043	320	0.273656	2.13108e-06	7.78743	1.33409	5.79819e-06	4.34617	0.656226	2.59376e-06	3.95254	2.02162	7.55225e-06	3.73573	1.22911	4.10941e-06	3.3434	0.656197	3.3434	3.87516	2.02158	7.42743e-06	3.67408	0.656212	1.86439e-06	2.84113	2.0216	5.0445e-06	2.4953	0.273652	1.97628e-06	7.22187	2.36221	0.00105685	2.36222	0.00105972	9.20053e-06	3.66747e-06		0.00192804
20220920	PF005	F10	Sm ICP ETH	Session #2	Dynamic 2 lines	300	H3PO4	1.6 mil	1.6 mil	4.49349	200	0.273662	3.84462e-06	14.0488	1.33409	9.02526e-06	6.7651	0.656222	4.10855e-06	6.26091	2.02159	1.01903e-05	5.04075	1.22911	6.10066e-06	4.96346	0.656193	4.96346	5.97906	2.02156	9.95539e-06	4.9246	0.656209	2.69442e-06	4.10603	2.02158	7.43771e-06	3.67916	0.273656	2.99927e-06	10.96	2.36456	0.00150079	2.36458	0.00150439	5.74808e-06	4.78971e-06		0.0012046
20220920	PF005	F11	Sm ICP ETH	Session #2	Dynamic 2 lines	300	H3PO4	1.6 mil	1.6 mil	5.97359	180	0.273657	3.12598e-06	11.423	1.33408	7.74191e-06	5.80318	0.656224	3.67016e-06	5.59285	2.02162	9.30765e-06	4.60406	1.2291	1.27717e-05	10.3911	0.656201	10.3911	5.31224	2.02155	1.05203e-05	5.20408	0.656213	2.3802e-06	3.62718	2.02159	7.17563e-06	3.5495	0.273656	2.66922e-06	9.75392	2.36534	0.00168709	2.36541	0.001686	3.40291e-06	2.54547e-06		0.00109145
20220920	PF005	F12	Sm ICP ETH	Session #2	Dynamic 2 lines	300	H3PO4	1.6 mil	1.6 mil	3.11579	400	0.273656	2.81192e-06	10.2754	1.33409	7.24735e-06	5.43243	0.656235	3.35136e-06	5.10695	2.02161	8.93765e-06	4.42105	1.22911	5.16304e-06	4.20065	0.656189	4.20065	5.09027	2.02159	8.85941e-06	4.3824	0.656211	2.29065e-06	3.49071	2.0216	6.32397e-06	3.1282	0.273651	2.32942e-06	8.51239	2.36298	0.00109901	2.36299	0.00110182	6.44846e-06	4.07138e-06		0.0024104
20220921	PF005	F13	Sm ICP ETH	Session #2	Dynamic 2 lines	300	H3PO4	1.6 mil	1.6 mil	2.54406	500	0.27366	3.11348e-06	11.3772	1.33409	7.71782e-06	5.78509	0.656224	3.42696e-06	5.22225	2.02161	9.32765e-06	4.61396	1.22912	5.08075e-06	4.13364	0.656198	4.13364	5.38564	2.02156	9.07524e-06	4.48922	0.65621	2.44908e-06	3.73216	2.02159	6.80184e-06	3.3646	0.273659	2.68936e-06	9.82742	2.36452	0.000856019	2.36454	0.000859275	6.0633e-06	4.66172e-06		0.00303797
20220921	PF005	F14	Sm ICP ETH	Session #2	Dynamic 2 lines	300	H3PO4	1.6 mil	1.6 mil	4.54175	340	0.273655	2.69715e-06	9.85604	1.33408	6.64292e-06	4.97939	0.656229	2.97465e-06	4.53294	2.02164	8.20286e-06	4.05754	1.22912	4.59668e-06	3.73982	0.656192	3.73982	4.5147	2.02156	9.04103e-06	4.4723	0.65621	2.10606e-06	3.20942	2.0216	5.98601e-06	2.96103	0.273657	2.24472e-06	8.20269	2.36516	0.00121791	2.3652	0.00121902	6.65613e-06	3.05818e-06		0.00205344
20220921	PF005	F15	Sm ICP ETH	Session #2	Dynamic 2 lines	300	H3PO4	1.6 mil	1.6 mil	4.8011	240	0.273662	3.29001e-06	12.0222	1.3341	7.48878e-06	5.61337	0.656216	3.27395e-06	4.98913	2.02163	9.52088e-06	4.7095	1.22912	5.35416e-06	4.35611	0.656199	4.35611	4.67516	2.02154	9.22311e-06	4.56241	0.656207	2.34592e-06	3.57497	2.02159	7.0019e-06	3.46356	0.273662	3.02635e-06	11.0587	2.36577	0.00115244	2.36582	0.00115305	4.53116e-06	3.56993e-06		0.00143694

## Sheet: 6. Dynamic 3 lines 152Sm-148Sm
Dynamic 2 lines method - corrected for mass fractionation with 152Sm/148Sm=2.37689
												L1			L1			L1			L1			L1			L1		L2			L2			L2			L2			L2		L3			L3			L3
Date	Barrel	Filament	Sample	Session	Method	Mass (ng)	Loading	EVAP	IONI	I152Sm (V)	n	144Sm/148Sm	2 SE	2 RSE (ppm)	147Sm/148Sm	2 SE	2 RSE (ppm)	149Sm/148Sm	2 SE	2 RSE (ppm)	150Sm/148Sm	2 SE	2 RSE (ppm)	154Sm/148Sm	2 SE	2 RSE (ppm)	152Sm/148Sm	2 SE	144Sm/148Sm	2 SE	2 RSE (ppm)	147Sm/148Sm	2 SE	2 RSE (ppm)	150Sm/148Sm	2 SE	2 RSE (ppm)	154Sm/148Sm	2 SE	2 RSE (ppm)	152Sm/148Sm	2 SE	149Sm/148Sm	2 SE	2 RSE (ppm)	150Sm/148Sm	2 SE	2 RSE (ppm)	154Sm/148Sm
20220510	PF002	F20	Sm ICP ETH	Session #1	Dynamic 3 lines	200	no activator	1.6 mil	1.6 mil	2.97881	160	0.273678	4.97599e-06	18.1819	1.33415	1.04619e-05	7.84161	1.22912	8.52907e-06	6.93918	0.656224	5.54581e-06	8.4511	2.0215	5.54581e-06	8.4511	2.37109	0.00161163	0.273659	4.94722e-06	18.078	1.3341	1.35937e-05	10.1894	0.656224	4.91882e-06	7.49564	2.02158	1.60773e-05	7.95285	2.3711	0.00161091	1.22913	8.042e-06	6.54286	0.656205	5.39278e-06	8.21814	2.02158
20220616	PF003	F01	Sm ICP ETH	Session #1	Dynamic 3 lines	200	no activator	1.6 mil	1.6 mil	2.76798	180	0.273687	4.46739e-06	16.323	1.33415	1.26405e-05	9.47451	1.22909	8.21729e-06	6.68566	0.656216	5.69384e-06	8.67678	2.02149	5.69384e-06	8.67678	2.37006	0.00116633	0.273667	4.68723e-06	17.1275	1.33409	1.17924e-05	8.83933	0.656236	6.10564e-06	9.30404	2.0216	1.49551e-05	7.39763	2.37002	0.00116261	1.22911	7.79155e-06	6.33918	0.6562	5.50701e-06	8.39227	2.0216
20220616	PF003	F02	Sm ICP ETH	Session #1	Dynamic 3 lines	200	no activator	1.6 mil	1.6 mil	3.97316	170	0.273673	3.88772e-06	14.2057	1.33415	9.67475e-06	7.25162	1.22911	7.51113e-06	6.11105	0.656222	4.50161e-06	6.85989	2.02154	4.50161e-06	6.85989	2.36952	0.00119253	0.273663	4.17638e-06	15.261	1.33409	9.84447e-06	7.37919	0.656222	4.99964e-06	7.61883	2.02161	1.31878e-05	6.5234	2.3695	0.00118836	1.22913	7.14669e-06	5.81445	0.656208	4.95135e-06	7.54539	2.02156
20220617	PF003	F12	Sm ICP ETH	Session #1	Dynamic 3 lines	200	no activator	1.6 mil	1.6 mil	2.1247	170	0.273686	6.76471e-06	24.717	1.33416	1.39055e-05	10.4226	1.2291	1.05046e-05	8.54659	0.656213	6.01618e-06	9.16803	2.02153	6.01618e-06	9.16803	2.36532	0.00144788	0.273664	5.87279e-06	21.4598	1.33409	1.49302e-05	11.1913	0.656227	6.55088e-06	9.98264	2.02161	1.74859e-05	8.64948	2.3653	0.00144382	1.22911	1.01086e-05	8.22435	0.656201	6.28521e-06	9.57817	2.02159
20220617	PF003	F13	Sm ICP ETH	Session #1	Dynamic 3 lines	200	no activator	1.6 mil	1.6 mil	2.32057	90	0.273687	9.26351e-06	33.8472	1.33416	2.6608e-05	19.9436	1.22912	1.52542e-05	12.4107	0.65621	9.42193e-06	14.3581	2.02151	9.42193e-06	14.3581	2.36755	0.0020463	0.273656	9.38403e-06	34.2914	1.33409	1.93902e-05	14.5344	0.656235	1.27064e-05	19.3626	2.02159	2.37675e-05	11.7569	2.36749	0.00205138	1.22912	1.53826e-05	12.5151	0.656212	9.23415e-06	14.0719	2.02162
20220618	PF003	F14	Sm ICP ETH	Session #1	Dynamic 3 lines	200	no activator	1.6 mil	1.6 mil	3.91721	120	0.273677	7.73487e-06	28.2628	1.33416	1.4376e-05	10.7753	1.22911	9.32064e-06	7.58322	0.656207	7.73257e-06	11.7837	2.0215	7.73257e-06	11.7837	2.36616	0.0017215	0.273669	5.70703e-06	20.8538	1.3341	1.50031e-05	11.2458	0.656228	7.18118e-06	10.9431	2.02159	1.95963e-05	9.69349	2.36615	0.00171737	1.22911	1.00093e-05	8.14354	0.656203	6.3838e-06	9.72839	2.02162
20220621	PF003	F15	Sm ICP ETH	Session #1	Dynamic 3 lines	300	no activator	1.6 mil	1.6 mil	3.5335	510	0.273684	2.63436e-06	9.62557	1.33416	6.40132e-06	4.79803	1.22911	4.2431e-06	3.45216	0.656216	3.01347e-06	4.59219	2.02149	3.01347e-06	4.59219	2.36629	0.00079727	0.273652	2.61171e-06	9.5439	1.33409	5.94184e-06	4.45384	0.656228	2.82895e-06	4.31093	2.0216	7.66696e-06	3.79252	2.36623	0.000797584	1.22911	4.47861e-06	3.64378	0.656201	2.43117e-06	3.70491	2.02159
20220621	PF003	F17	Sm ICP ETH	Session #1	Dynamic 3 lines	300	no activator	1.6 mil	1.6 mil	3.70397	400	0.273677	2.76204e-06	10.0923	1.33416	6.38286e-06	4.78419	1.22912	4.81018e-06	3.91352	0.656217	3.12388e-06	4.76044	2.0215	3.12388e-06	4.76044	2.36432	0.000634789	0.273659	2.94751e-06	10.7707	1.33409	7.15818e-06	5.36559	0.656225	3.1342e-06	4.77611	2.02159	9.03852e-06	4.47099	2.36423	0.000630484	1.22911	4.72735e-06	3.84615	0.6562	2.99906e-06	4.57035	2.02158
[truncated: 43 more columns]

## Sheet: 7. Nd isotope compositions
Nd isotope compositions - corrected for mass fractionation with 146Nd/144Nd=0.7219
Date	Barrel	Filament	Sample	Session	Mass (ng)	I142Nd (V)	142Nd/144Nd dyn 1-3	2 SE	142Nd/144Nd 2-4	2 SE	142Nd/144Nd all dyn	2 SE	143Nd/144Nd dyn 1-3	2 SE	143Nd/144Nd 2-4	2 SE	143Nd/144Nd all dyn	2 SE	145Nd/144Nd dyn 2-1	2 SE	145Nd/144Nd dyn 3-2	2 SE	145Nd/144Nd dyn 4-3	2 SE	145Nd/144Nd all dyn	2 SE	148Nd/144Nd dyn 1-3	2 SE	148Nd/144Nd dyn 2-4	2 SE	148Nd/144Nd all dyn	2 SE	150Nd/144Nd static	2 SE	142 cycles	139La/144Nd	140Ce/144Nd	141Pr/144Nd	147Sm/144Nd	Avg. 146Nd/144Nd
20230727	JB001	F08	JNdi-1	Session #1	1000	4.48	1.14184	4.82187e-06	1.14184	4.92739e-06	1.14184	3.44292e-06	0.512104	1.84693e-06	0.512103	1.65531e-06	0.512103	1.24097e-06	0.348405	1.49202e-06	0.348403	1.47635e-06	0.348404	1.34881e-06	0.348404	8.31261e-07	0.241583	1.84278e-06	0.241579	1.81936e-06	0.241581	1.30676e-06	0.236417	3.07532e-06	192	1.16874e-05	5.06126e-06	3.7838e-05	-1.20506e-06	0.722452
20230728	JB001	F10	JNdi-1	Session #1	1000	5.51	1.14183	2.96817e-06	1.14184	3.41507e-06	1.14184	2.26967e-06	0.512103	1.26571e-06	0.512103	1.25485e-06	0.512103	8.90915e-07	0.348404	1.03135e-06	0.348403	1.03932e-06	0.348403	9.46928e-07	0.348403	5.81825e-07	0.241578	1.13508e-06	0.241581	1.23518e-06	0.241579	8.42573e-07	0.23642	2.14989e-06	324	1.05117e-05	4.62618e-06	3.96904e-05	-1.52029e-06	0.722554
20230803	JB001	F12	JNdi-1	Session #1	1000	5.5	1.14184	2.86146e-06	1.14184	3.21918e-06	1.14184	2.15538e-06	0.512104	1.03985e-06	0.512105	1.09876e-06	0.512105	7.56512e-07	0.348404	8.83115e-07	0.348403	8.77416e-07	0.348405	9.19033e-07	0.348404	5.17597e-07	0.241581	1.14835e-06	0.241579	1.1213e-06	0.24158	8.04561e-07	0.236418	2.02893e-06	431	1.72193e-05	5.4392e-06	4.19694e-05	-1.01737e-06	0.722366
20230804	JB001	F14	JNdi-1	Session #1	1000	4.97	1.14183	2.39745e-06	1.14184	2.63905e-06	1.14184	1.78283e-06	0.512103	9.77247e-07	0.512105	1.00387e-06	0.512104	7.0156e-07	0.348405	7.50514e-07	0.348404	7.78938e-07	0.348405	7.82521e-07	0.348405	4.45903e-07	0.24158	9.37707e-07	0.241582	9.59701e-07	0.241581	6.72778e-07	0.236417	1.62434e-06	570	1.61707e-05	5.03032e-06	4.16868e-05	-2.45978e-06	0.722129
20230805	JB001	F16	JNdi-1	Session #1	1000	5.76	1.14184	2.39662e-06	1.14184	2.47209e-06	1.14184	1.7274e-06	0.512105	9.04021e-07	0.512105	9.49331e-07	0.512105	6.55564e-07	0.348405	6.81252e-07	0.348403	6.95203e-07	0.348404	6.93202e-07	0.348404	4.00133e-07	0.24158	8.73647e-07	0.241581	8.36157e-07	0.24158	6.05177e-07	0.236416	1.50101e-06	579	1.30818e-05	5.42775e-06	4.47357e-05	-1.86073e-06	0.722147
20230726	JB001	F01	BCR-2	Session #1	900	4.37	1.14184	4.34195e-06	1.14183	4.18585e-06	1.14183	3.02124e-06	0.512625	1.56891e-06	0.512625	1.57187e-06	0.512625	1.1096e-06	0.348406	1.21708e-06	0.348404	1.20446e-06	0.348405	1.13456e-06	0.348405	6.86531e-07	0.241579	1.48851e-06	0.241582	1.48936e-06	0.241581	1.0582e-06	0.236419	2.66528e-06	305	8.84098e-06	5.68365e-06	1.08307e-05	-6.29447e-06	0.723097
20230802	JB001	F03	BIR-1 #1	Session #1	900	6.48	1.14183	2.71378e-06	1.14184	3.05737e-06	1.14184	2.05419e-06	0.513078	1.13359e-06	0.51308	1.10365e-06	0.513079	7.93303e-07	0.348405	8.38421e-07	0.348403	8.38297e-07	0.348404	8.56057e-07	0.348404	4.8798e-07	0.241582	1.00844e-06	0.241583	1.0638e-06	0.241582	7.33508e-07	0.236418	1.81986e-06	382	1.55207e-06	6.84255e-06	8.07969e-06	-4.16236e-06	0.722747
20230802	JB001	F09	BIR-1 #2	Session #1	900	4.19	1.14184	3.21582e-06	1.14184	3.15489e-06	1.14184	2.25571e-06	0.513082	1.24924e-06	0.513083	1.14969e-06	0.513082	8.48759e-07	0.348405	8.8743e-07	0.348403	9.6409e-07	0.348405	9.7262e-07	0.348405	5.45481e-07	0.241579	1.19735e-06	0.241582	1.22849e-06	0.24158	8.64933e-07	0.236417	1.94299e-06	486	6.03903e-05	0.000151753	4.72693e-05	-4.45409e-06	0.723298
20230803	JB001	F11	BHVO-2 D2	Session #1	950	5.2	1.14184	3.04852e-06	1.14184	2.82972e-06	1.14184	2.08452e-06	0.512975	1.1615e-06	0.512977	1.26026e-06	0.512976	8.57504e-07	0.348405	8.37266e-07	0.348404	9.98706e-07	0.348405	9.19727e-07	0.348405	5.33238e-07	0.241578	1.13858e-06	0.241583	1.16824e-06	0.24158	8.34154e-07	0.236417	1.95518e-06	383	8.9346e-06	7.54613e-06	1.60039e-05	-5.02122e-06	0.723
20230804	JB001	F13	DNC-1	Session #1	1000	5.76	1.14184	2.88881e-06	1.14184	3.33016e-06	1.14184	2.2103e-06	0.512455	1.08133e-06	0.512456	1.29472e-06	0.512456	8.45212e-07	0.348405	8.80296e-07	0.348405	8.10625e-07	0.348405	9.72814e-07	0.348405	5.14833e-07	0.241581	1.0839e-06	0.24158	1.22576e-06	0.241581	8.21626e-07	0.236418	1.94779e-06	419	3.03545e-05	3.55602e-05	2.92974e-05	-2.13735e-06	0.722263
20230805	JB001	F15	W2-a	Session #1	780	6.85	1.14184	3.55858e-06	1.14184	3.56495e-06	1.14184	2.51924e-06	0.512511	1.09391e-06	0.512513	1.13938e-06	0.512512	7.93069e-07	0.348405	8.89956e-07	0.348403	8.63671e-07	0.348405	8.46693e-07	0.348404	5.01358e-07	0.241581	1.13687e-06	0.24158	1.05472e-06	0.241581	7.75318e-07	0.236418	1.61457e-06	436	6.02125e-06	2.08888e-05	1.39143e-05	4.24171e-06	0.723215
20231205	JB002	F01	JNdi-1	Session #2	800	5.59	1.14184	2.60514e-06	1.14184	2.54411e-06	1.14184	1.82812e-06	0.512103	9.80628e-07	0.512104	9.93333e-07	0.512104	6.98459e-07	0.348405	7.54131e-07	0.348404	7.5526e-07	0.348404	7.74466e-07	0.348405	4.39647e-07	0.24158	9.3021e-07	0.241581	9.53598e-07	0.24158	6.6739e-07	0.23641	1.59769e-06	504	9.02344e-06	3.20209e-06	3.78545e-05	2.55644e-06	0.722336
20231207	JB002	F02	JNdi-1	Session #2	800	5.51	1.14184	3.23652e-06	1.14184	3.36857e-06	1.14184	2.33673e-06	0.512105	1.29745e-06	0.512105	1.22376e-06	0.512105	8.91406e-07	0.348407	9.57808e-07	0.348405	1.01131e-06	0.348405	1.00007e-06	0.348406	5.73383e-07	0.241577	1.23512e-06	0.241581	1.20075e-06	0.241579	8.72686e-07	0.236408	2.05375e-06	335	8.72061e-06	6.27718e-06	3.15512e-05	4.2365e-06	0.723411
20231214	JB002	F05	JNdi-1	Session #2	800	4.46	1.14184	3.69055e-06	1.14184	2.75854e-06	1.14184	2.31312e-06	0.512107	1.20064e-06	0.512106	1.15316e-06	0.512107	8.32574e-07	0.348405	8.84571e-07	0.348404	9.25805e-07	0.348406	1.37965e-06	0.348405	6.28893e-07	0.241582	1.04156e-06	0.24158	1.18934e-06	0.241581	7.93806e-07	0.236413	1.98174e-06	586	1.40236e-05	1.09884e-05	4.39049e-05	4.15355e-06	0.722177
20240110	JB003	F01	JNdi-1	Session #2	800	6.22	1.14184	2.40204e-06	1.14184	2.55575e-06	1.14184	1.75468e-06	0.512106	1.01388e-06	0.512105	1.00902e-06	0.512106	7.15302e-07	0.348407	7.09412e-07	0.348406	7.80498e-07	0.348406	7.29497e-07	0.348406	4.2766e-07	0.241579	8.47936e-07	0.24158	8.58575e-07	0.241579	6.0427e-07	0.236408	1.67391e-06	518	1.43039e-05	1.01222e-05	3.92893e-05	4.76716e-06	0.722681
20240110	JB003	F02	JNdi-1	Session #2	800	4.8	1.14184	2.18071e-06	1.14184	2.17804e-06	1.14184	1.54075e-06	0.512103	8.54636e-07	0.512104	8.55462e-07	0.512104	6.04626e-07	0.348406	6.37702e-07	0.348406	6.4663e-07	0.348404	6.59245e-07	0.348405	3.75282e-07	0.24158	8.03139e-07	0.241578	7.91516e-07	0.241579	5.67237e-07	0.236407	1.46828e-06	856	1.30381e-05	4.13035e-06	3.55445e-05	4.15539e-06	0.722905
20240111	JB003	F03	JNdi-1	Session #2	800	6.31	1.14184	1.9338e-06	1.14184	1.95785e-06	1.14184	1.37664e-06	0.512104	7.43085e-07	0.512105	7.81382e-07	0.512105	5.39595e-07	0.348407	5.71005e-07	0.348406	5.83655e-07	0.348406	5.82173e-07	0.348406	3.34392e-07	0.24158	7.30017e-07	0.241577	8.05036e-07	0.241578	5.49712e-07	0.236408	1.32287e-06	749	1.18867e-05	6.20125e-06	3.56618e-05	4.09162e-06	0.723056
20240113	JB003	F08	JNdi-1	Session #2	800	6.37	1.14184	1.75358e-06	1.14184	1.75044e-06	1.14184	1.23867e-06	0.512105	6.60845e-07	0.512104	6.51356e-07	0.512104	4.63996e-07	0.348407	5.08554e-07	0.348405	4.94268e-07	0.348405	4.96059e-07	0.348406	2.89415e-07	0.241579	5.95851e-07	0.241581	6.14463e-07	0.24158	4.30676e-07	0.236412	1.10146e-06	1017	1.14768e-05	5.40673e-06	3.32658e-05	4.31251e-06	0.723177
20240116	JB003	F09	JNdi-1	Session #2	800	6.33	1.14184	2.1738e-06	1.14184	2.12052e-06	1.14184	1.51794e-06	0.512105	7.56706e-07	0.512105	7.72346e-07	0.512105	5.40558e-07	0.348407	5.96976e-07	0.348406	5.99793e-07	0.348406	5.9956e-07	0.348406	3.46214e-07	0.241581	7.6468e-07	0.24158	7.87992e-07	0.241581	5.4927e-07	0.236413	1.26698e-06	960	1.056e-05	5.16582e-06	3.32288e-05	4.13522e-06	0.723442
20240118	JB003	F10	JNdi-1	Session #2	800	6.85	1.14184	1.48614e-06	1.14184	1.57804e-06	1.14184	1.08429e-06	0.512104	5.71151e-07	0.512104	5.79806e-07	0.512104	4.06876e-07	0.348406	4.54752e-07	0.348405	4.82211e-07	0.348406	4.62314e-07	0.348406	2.69359e-07	0.241581	5.59455e-07	0.241579	5.70539e-07	0.24158	4.01485e-07	0.236414	1.03937e-06	1144	9.24026e-06	2.15932e-06	3.52358e-05	3.64462e-06	0.722701
20240120	PF015	F01	JNdi-1	Session #2	1000	6.93	1.14184	2.77825e-06	1.14183	2.91337e-06	1.14183	2.01243e-06	0.512103	1.11862e-06	0.512102	1.12449e-06	0.512102	7.92529e-07	0.348406	8.79615e-07	0.348406	8.60954e-07	0.348406	7.98478e-07	0.348406	4.89196e-07	0.241582	1.00731e-06	0.24158	9.78296e-07	0.241581	7.06574e-07	0.236414	1.84677e-06	340	5.83377e-06	1.178e-06	2.91699e-05	3.87533e-06	0.723
20240120	PF015	F02	JNdi-1	Session #2	1000	6.1	1.14184	2.16838e-06	1.14184	2.20037e-06	1.14184	1.54561e-06	0.512106	8.24946e-07	0.512106	7.87541e-07	0.512106	5.70263e-07	0.348407	6.23117e-07	0.348406	6.15444e-07	0.348406	6.3871e-07	0.348406	3.612e-07	0.241581	6.99719e-07	0.241578	7.51337e-07	0.241579	5.16433e-07	0.236411	1.29396e-06	879	1.63475e-05	9.56443e-06	3.9719e-05	4.81649e-06	0.722866
20240123	PF015	F03	JNdi-1	Session #2	1000	6.54	1.14184	2.0597e-06	1.14184	1.99721e-06	1.14184	1.43466e-06	0.512104	8.23492e-07	0.512103	7.95106e-07	0.512104	5.7253e-07	0.348406	6.01886e-07	0.348406	6.18255e-07	0.348405	6.15166e-07	0.348406	3.53688e-07	0.241581	7.50983e-07	0.241578	7.83265e-07	0.24158	5.47091e-07	0.236413	1.23163e-06	889	1.37774e-05	4.85886e-06	3.66672e-05	3.97607e-06	0.722754
20240126	PF015	F04	JNdi-1	Session #2	1000	6.76	1.14184	1.91107e-06	1.14184	1.95717e-06	1.14184	1.36715e-06	0.512104	7.24419e-07	0.512103	7.09286e-07	0.512103	5.07163e-07	0.348406	5.40573e-07	0.348405	5.39349e-07	0.348405	5.56857e-07	0.348405	3.15826e-07	0.24158	7.28131e-07	0.241578	7.11969e-07	0.241579	5.10042e-07	0.236413	1.16313e-06	867	1.38029e-05	5.19469e-06	3.83837e-05	4.25207e-06	0.722558
20240129	PF015	F05	JNdi-1	Session #2	1000	6.2	1.14183	2.23744e-06	1.14183	2.35055e-06	1.14183	1.62212e-06	0.512103	9.23542e-07	0.512102	8.34435e-07	0.512102	6.23515e-07	0.348406	6.80649e-07	0.348405	6.59033e-07	0.348404	6.99423e-07	0.348405	3.93649e-07	0.241579	8.47793e-07	0.241581	8.22804e-07	0.24158	5.93337e-07	0.236413	1.42622e-06	599	9.55436e-06	2.00448e-06	3.35668e-05	4.05882e-06	0.722817
20240131	PF015	F06	JNdi-1	Session #2	1000	6.33	1.14183	1.80787e-06	1.14184	1.90878e-06	1.14184	1.31686e-06	0.512104	7.42534e-07	0.512103	7.11401e-07	0.512103	5.14109e-07	0.348406	5.33917e-07	0.348405	5.6386e-07	0.348405	5.54559e-07	0.348406	3.18549e-07	0.24158	7.03713e-07	0.24158	7.35498e-07	0.24158	5.08901e-07	0.236413	1.20184e-06	854	1.63046e-05	7.08986e-06	4.36539e-05	3.94156e-06	0.722291
20240201	PF015	F07	JNdi-1	Session #2	1000	8.28	1.14184	1.62612e-06	1.14184	1.67198e-06	1.14184	1.16589e-06	0.512105	6.80462e-07	0.512105	6.44776e-07	0.512105	4.69099e-07	0.348407	4.88944e-07	0.348406	4.89355e-07	0.348406	5.04292e-07	0.348406	2.85654e-07	0.24158	6.17248e-07	0.24158	5.94953e-07	0.24158	4.28602e-07	0.23641	1.10578e-06	856	1.54188e-05	7.85588e-06	4.26585e-05	3.65649e-06	0.722286
20231205	JB002	F13	Allende	Session #2	850	5.99	1.14181	3.6921e-06	1.1418	3.33536e-06	1.1418	2.48917e-06	0.51255	1.28166e-06	0.512549	1.28246e-06	0.51255	9.06977e-07	0.348408	9.69084e-07	0.348407	8.85254e-07	0.348407	9.63916e-07	0.348407	5.42898e-07	0.241581	1.35719e-06	0.241581	1.23991e-06	0.241581	9.19786e-07	0.236414	1.94766e-06	349	3.70842e-06	5.81342e-06	6.30743e-06	1.4489e-06	0.723024
20231207	JB002	F12	BE-N	Session #2	1000	3.62	1.14184	3.03235e-06	1.14183	3.04047e-06	1.14183	2.14742e-06	0.51287	1.16659e-06	0.51287	1.16611e-06	0.51287	8.24417e-07	0.348405	9.18933e-07	0.348405	9.45185e-07	0.348405	9.10705e-07	0.348405	5.33949e-07	0.241578	1.17208e-06	0.241582	1.09506e-06	0.24158	8.09103e-07	0.23641	1.98001e-06	570	3.52456e-06	3.43569e-06	3.29847e-06	1.17304e-06	0.722023
20231215	JB002	F14	UB-N	Session #2	800	4.77	1.14184	2.99895e-06	1.14184	2.83262e-06	1.14184	2.0616e-06	0.512925	1.17713e-06	0.512925	1.23616e-06	0.512925	8.52947e-07	0.348407	9.33342e-07	0.348406	8.38354e-07	0.348404	8.82088e-07	0.348406	5.14692e-07	0.241582	1.01251e-06	0.241576	1.01347e-06	0.241579	7.43389e-07	0.236409	1.88133e-06	452	1.43169e-06	1.42202e-06	3.03392e-06	9.01225e-07	0.722852
20231216	JB002	F17	A6	Session #2	530	4.44	1.14184	3.01043e-06	1.14184	3.04195e-06	1.14184	2.13935e-06	0.512425	1.20908e-06	0.512425	1.2139e-06	0.512425	8.56421e-07	0.348403	9.80161e-07	0.348402	9.64375e-07	0.348402	9.30905e-07	0.348403	5.53849e-07	0.241584	1.12648e-06	0.241584	1.27935e-06	0.241584	8.51444e-07	0.23643	2.0653e-06	430	4.55577e-06	5.55359e-06	7.37381e-06	1.06955e-05	0.722647
20240121	PF015	F21	A7	Session #2	1000	5.77	1.14184	2.48204e-06	1.14184	2.3332e-06	1.14184	1.7036e-06	0.512427	9.62992e-07	0.512427	9.10485e-07	0.512427	6.62679e-07	0.348406	7.22281e-07	0.348405	7.40251e-07	0.348405	7.33101e-07	0.348406	4.23176e-07	0.24158	8.83291e-07	0.241578	9.33781e-07	0.241579	6.45145e-07	0.236409	1.46198e-06	575	4.48578e-06	5.65815e-06	5.96405e-06	2.71053e-06	0.721923
20240131	PF015	F15	A8	Session #2	540	4.03	1.14183	5.647e-06	1.14184	5.36215e-06	1.14183	3.95267e-06	0.51243	2.1262e-06	0.512432	2.11293e-06	0.512431	1.49896e-06	0.348409	1.44295e-06	0.34841	1.62403e-06	0.348411	1.44557e-06	0.34841	8.70635e-07	0.241577	1.75962e-06	0.24158	2.09177e-06	0.241578	1.37389e-06	0.236392	2.98226e-06	190	4.27297e-05	1.14648e-05	1.14963e-05	1.24624e-05	0.723434
